# Supplementary material for: Ground motions variability in Israel from 3-D simulations of M 6 and M 7 earthquakes
Source: Copernicus journal article supplement (doi:10.5194/nhess-2021-280), 2021-10-19
Supplement: Supplementary file 1 [file nhess-2021-280-supplement.pdf]

## Supplementary Material

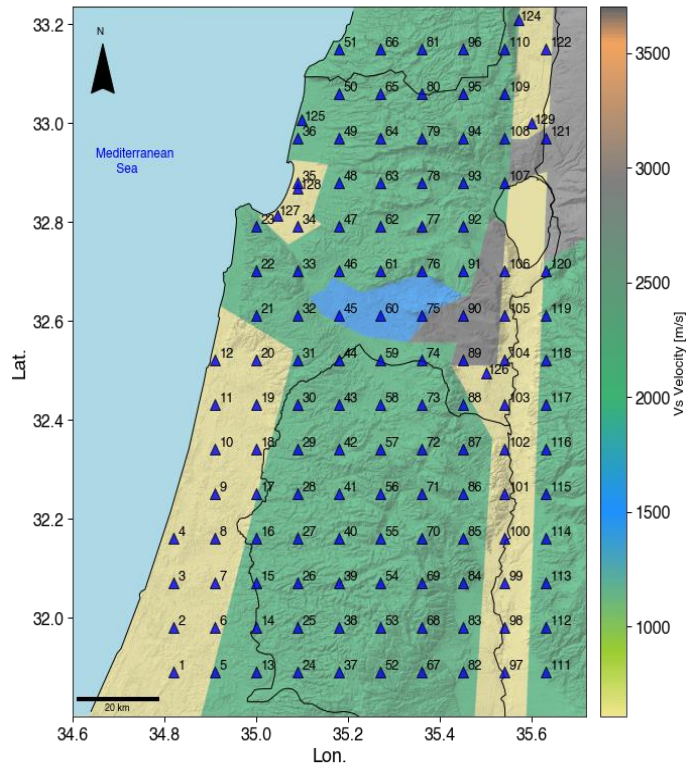

**Figure S1.** Numerated Synthetic stations grid (blue triangles), deployed in our model.

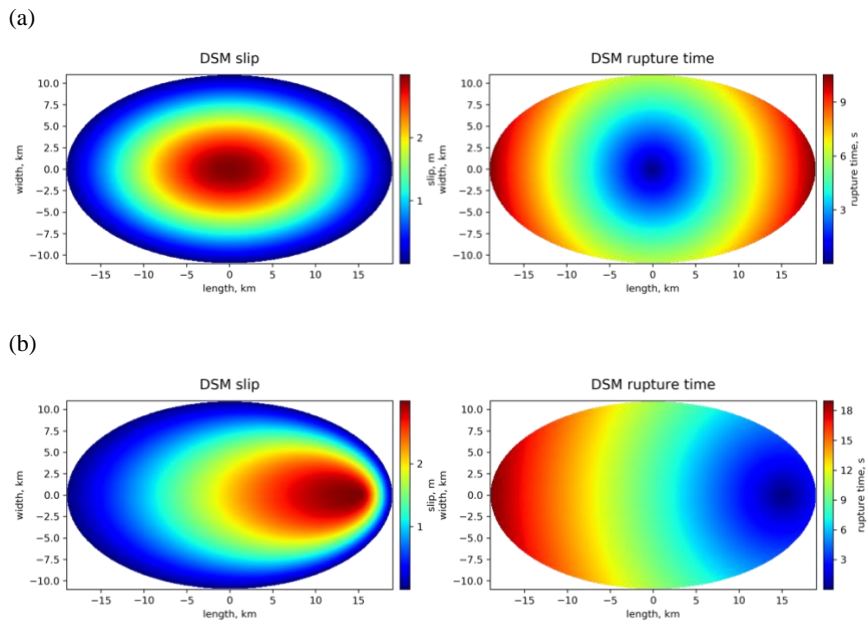

**Figure S2.** Examples of Rupture patches of the DSM, as used in simulating (a) symmetric and (b) southward unilateral M 7 rupture models.

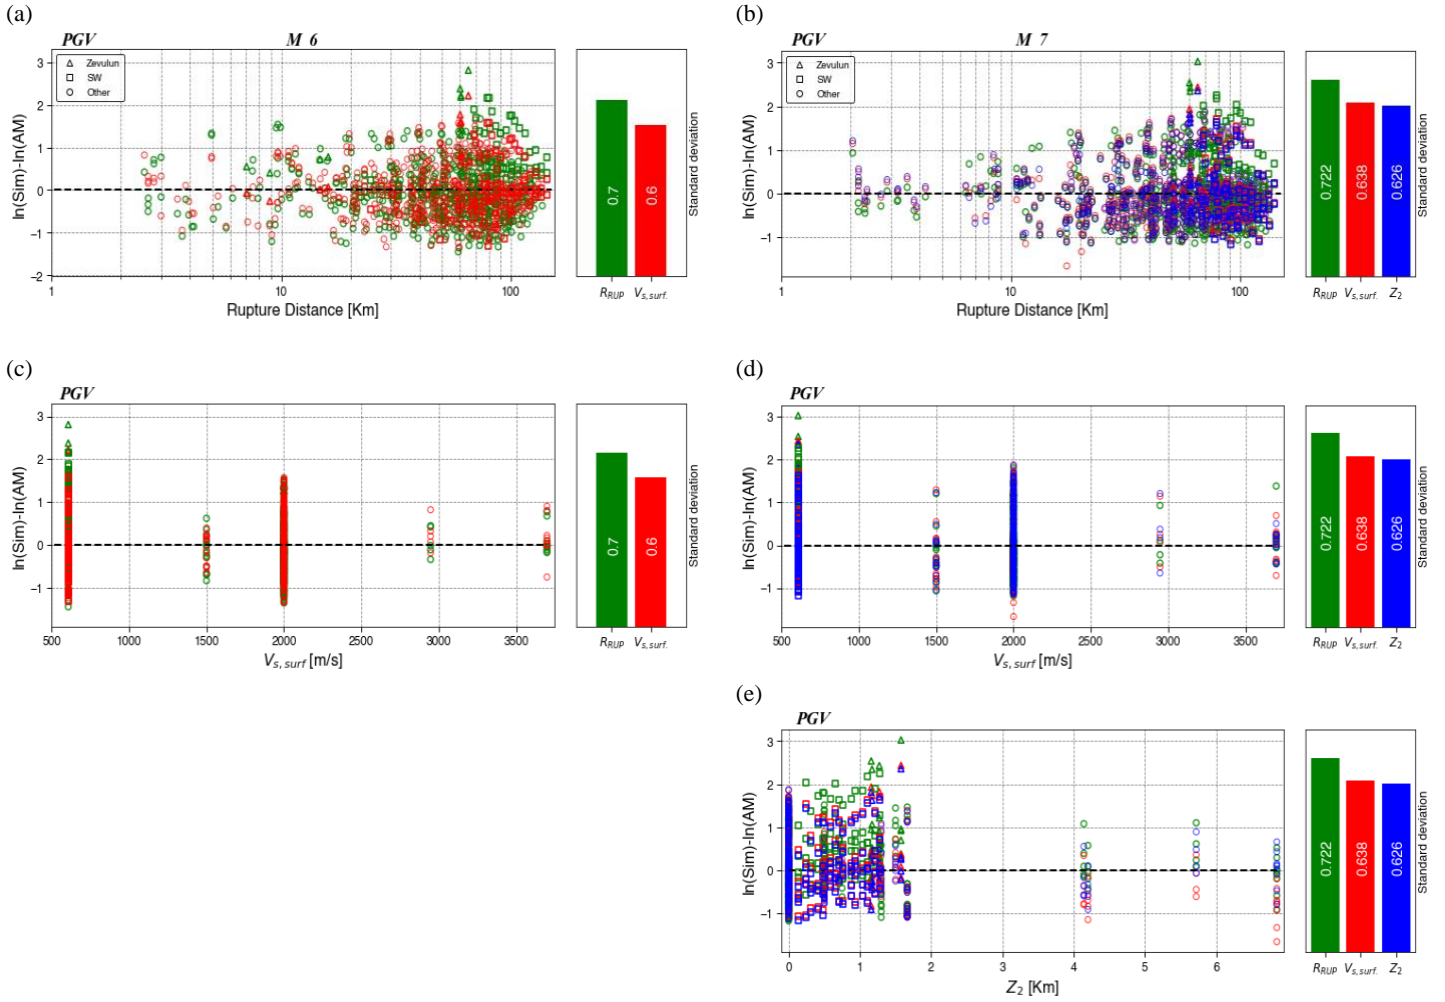

**Figure S3.** Residuals between simulated and attenuation model (AM) PGV for M 6 (left) and M 7 (right), as a function of each of the explanatory variables; (a) and (b) rupture distance ( $R_{RUP}$ ), (c) and (d) surface shear wave velocity ( $V_{s,surf}$ ), (e) depth to  $V_s = 2$  km/s beneath the site ( $Z_2$ ). The green, red and blue colors correspond to the residual's standard deviation, evolving with each added explanatory variable (green-  $R_{RUP}$ , red-  $R_{RUP}$  and  $V_{s,surf}$ , blue-  $R_{RUP}$ ,  $V_{s,surf}$  and  $Z_2$ ). The records from Zevulun valley and the Sedimentary wedge marked with triangles and rectangles respectively. The other records marked with circles.

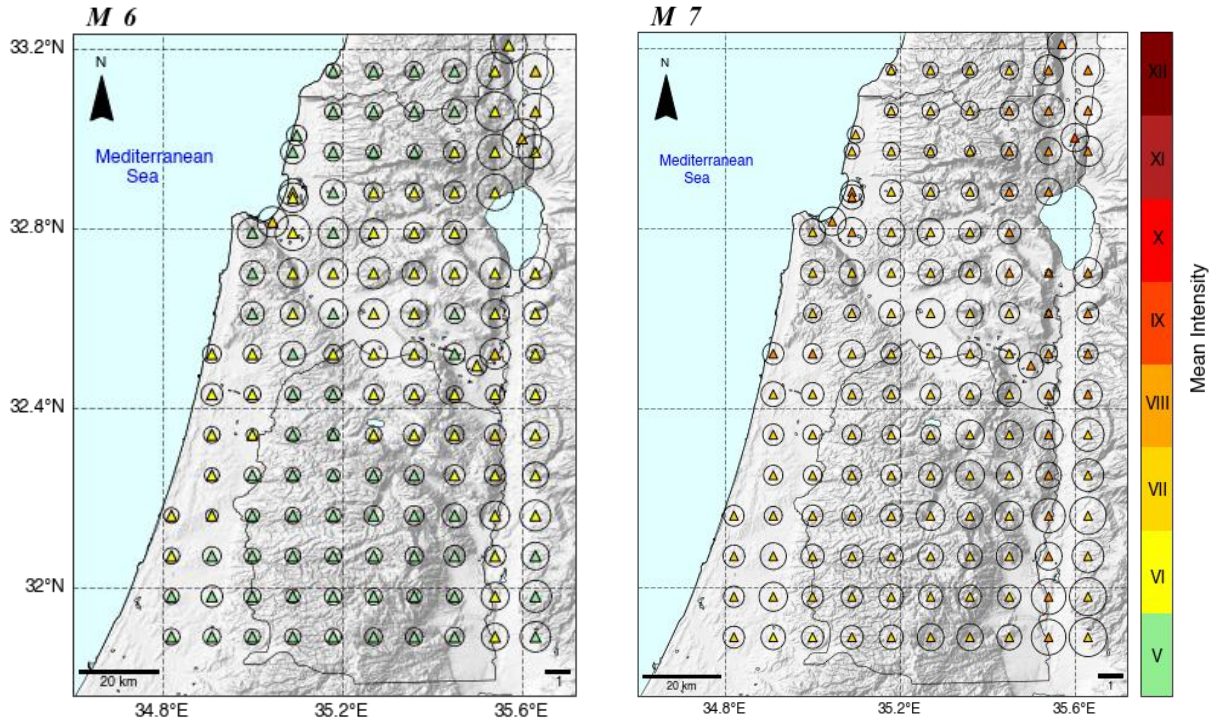

**Figure S4.** Map view of simulated mean EMS intensity calculated according to Kaestli & Fäh, (2006) and rounded off to the nearest integer (triangles) for M 6 (left) and M 7 (right) and their standard deviation (diameter of the circles) at each station.
