# Supplementary material for: Ground motions variability in Israel from 3-D simulations of M 6 and M 7 earthquakes
Source: Copernicus journal article supplement (doi:10.5194/nhess-2021-280), 2021-10-19
Supplement: Supplementary file [file nhess-2021-280-AC1-supplement.pdf]

Re: Authors Reply to Review nhess-2021-280

Dear reviewer,

We would like to thank you for reviewing our paper, “*Ground motions variability in Israel from 3-D simulations of M 6 and M 7 earthquakes*” (nhess-2021-280).

Thank you for the time spent and the positive attitude towards this work. Your remarks and critique certainly improved the manuscript.

Attached below is our pointwise reply to the general and specific comments. All the changes and additions are marked in the revised version of the manuscript.

All the co-authors approved the revision. Please address all correspondence to:

*Jonatan Glehman*

Department of Earth and Environmental Sciences  
Ben Gurion University of the Negev  
Beer-Sheva 8410501  
Israel.

[glechman@post.bgu.ac.il](mailto:glechman@post.bgu.ac.il)

Referee comments for manuscript nness-2021-280 titled “Ground motions variability in Israel from 3-D simulations of M6 and M7 earthquakes”, by Jonatan Glehman and Michael Tsesarsky

### General comments

The manuscript describes a study of ground motion variability associated with simulations of 3D ground motions from M7 and M6 earthquakes, along major seismogenic sources in Israel. The authors use a 3-D model of the sub-surface that describes the main features of the spatial heterogeneity in Israel and simulate the ground motions at 129 measurement locations in the northern part of Israel. Then the authors derive a statistical attenuation model based on the simulations, and analyse the residuals, single station variability and significant durations.

This is of importance to low-moderate seismicity regions, and specifically to Israel. Complementing the instrumental catalogue with simulated strong ground motions is important, as well as understating and evaluating the variability associated with the simulated ground motions.

### Specific comments

Why is there no subfigure for the minimization of the residuals to all 3 predictor variables in Figure S3 for magnitude 6?

**Reply:** For M6,  $Z_2$  has a minimal impact on the residual's standard deviation ( $<0.001$ ), therefore we decided to not include it as an explanatory variable (please refer to table 4 and lines 406-408 on page 18); Hence, there was no subfigure for  $Z_2$  in figure S3 for M 6.

However, to clarify this point further, we followed your suggestion and added the quantitative impact of  $Z_2$  on M 6 and the impact of  $Z_2$  on the minimization of the total residuals in Figure S3 (a,c and e). Thank you. Please refer to lines 404 - 407 in the revised manuscript.

When comparing the simulations to CB14 – can the authors elaborate as to the predictor variable values used in CB14? Did they use 608 m/s for  $V_{s30}$ ?

**Reply:** Thank you for this comment. The CB-14 PGVs were calculated for a strike-slip fault, where we used the surface shear wave velocity as the  $V_{s30}$  parameter input for CB-14 (this is due the minimum grid spacing of 76 meters). The Basin response term  $Z_2$  in our model is analogue to  $Z_{2.5}$  in CB-14. The Magnitude term was calculated according to the simulated magnitudes; Mw 6.21 and Mw 6.85. We added this information and an example of CB-14 GMM to Figure 5 to clarify this point further, please refer to lines 270 – 271 (Figure 5. Caption) and 337-339 in the revised manuscript.

It seems like the AM over-predicts GM at the sedimentary wedge rupture distances (Figure 9), can the authors comment on that? It would seem that most of the data at these distances is lower, and will result in a lower model that under-predicts.

**Reply:** Thank you for this valuable comment. The residuals between the simulated and AM (mean PGVs in Figures 7 and 8 show that, except for stations 18 and 17 (located on the edge of the Sedimentary wedge), the AM under-predicts the ground motions at the Sedimentary wedge. Thus, the contribution to the AM's over-prediction comes from other sites located at these distances. As mentioned on page 15, lines: 348-351, the residuals were computed as a moving average over distance. Thus, they are independent of site-specific terms.

Lines 354 – 363: I really don't see this in the data. I don't see the triangles lower than the squares, and it is very difficult to tell them at all from the other symbols. I suggest thinking of a clearer way to present the data, as presently the figure does not support the statements in the text.

**Reply:** Thank you for pointing it out. We modified figure 10 to support the text in the lines mentioned above.

In lines 389 – 391, the authors state that the AM couldn't capture the full site effects of the Zevulun Valley and the sedimentary wedge, and further model refinements are required. Do the authors think that such effects can be incorporated successfully into a regional GMM?

**Reply:** This is a challenging question. We do believe that such effects could be incorporated into a regional GMM. We are currently studying additional terms; unique to the Zevulun Valley and the Sedimentary wedge, such as  $Z_{0.8}$  as well as distance-dependent and rupture velocity-dependent attenuation terms, for directivity and super-shear ruptures, among others. We added this information to the revised manuscript. Please refer to lines 462 - 464.

### Technical corrections

The acronyms GMM and GMPE are used throughout the manuscript, please select one and be consistent.

**Reply:** Thank you for this comment. We changed all acronyms to GMM.

The past and present tense are used interchangeably to describe what is / was done. Please select one and be consistent.

**Reply:** Corrected. Thank you.

Line 70 – what is a magnitude limited GMPE? Unclear. Please explain.

**Reply:** Explained. Thank you.

Line 93: Israel should be Israeli.

**Reply:** Corrected. Thank you.

Line 93: ranges should be range.

**Reply:** Corrected. Thank you.

Figure 1 caption (lines 121, 123): I think it should say Israel seismic network **stations**.

**Reply:** Corrected. Thank you.

Line 135: “the Israeli coastal plain, “ - the comma is missing, and the word “is” should be deleted.

**Reply:** Corrected. Thank you.

Line 143: delineate rather than delimit.

**Reply:** Corrected. Thank you.

Lines 159 – 166: the word rupture is misspelled many times.

**Reply:** Corrected. Thank you.

Line 179: “ground motions records”- the ‘s’ should be deleted.

**Reply:** Corrected, line 181. Thank you.

Line 182: the sentence “we developed the regional velocity model of Shimony et al (2021) is unclear. If the model is Shimony et al.’s – then it wasn’t developed by the authors. If it is a modification, or based on their results, then please explain what was done.

**Reply:** Thank you for highlighting this point. The model of Shimony et al., was refined and expanded. We added this information to the text, lines 184-186 in the revised manuscript.

Line 183: the word “following” here seems awkward. Please consider rephrasing.

**Reply:** Corrected, line 186. Thank you.

Line 185 – “statistical analysis **of** the synthetic database”.

**Reply:** Corrected, line 188. Thank you.

Line 203: in the Gvirtzman et al. quote the comma should be deleted. Also, the capital T in The Zevulun Valley is unnecessary.

**Reply:** Corrected, line 208. Thank you.

Line 255: station 123 is not visible in Figure S1.

**Reply:** Thank you for pointing it out. We added station 123 to Figure S1.

Line 281 – it seems like there should be a better way to start a sentence than “Following, “. Perhaps: “We then examine the simulated...”.

**Reply:** Corrected, line 290. Thank you.

Page 14 – Fig. 6 – it seems that the SF scenario is missing from the figure altogether but referred to in the text. This is also true for figure 5. I also recommend that in the captions of figures 5 and 6 the abbreviations of the faults and source characteristics be explained again.

**Reply:** Thank you for this comment. The SF (Shemona fault) scenario appears in figures 5 and 6 for M 7 scenarios. We did not model this scenario for M 6. Please refer to Table 3. We added additional description to these figures, as suggested, lines 266-268 (figure 5) and lines 314-316 (figure 6).

Line 299: the trade off sentence is a bit unclear (what trades off here). I suggest adding: “... between the ground motion intensity in the Zevulun Valley (triangles) and the *ground motion intensity* in the Sedimentary wedge....”.

**Reply:** Modified. Thank you, see lines 306-313.

Line 300 – a comma is missing before “...in an asymmetric rupture...”

**Reply:** Added, line 307. Thank you.

Figure 7 – the color bar of the mean peak ground velocity isn’t very visible, I advise you to pick different colors, and make them vivid, say green – yellow – orange- red. Right now it is very difficult to observe the colors. Also, since you give just two locations as examples (station 129 and stations 127), it would be more convenient to identify these in the figure, rather than refer to a figure in the supplementary material.

**Reply:** We modified the color bar and added stations 127 and 129 to the figure. Thank you.

Lines 369-375: this paragraph seems more suited to a summary section.

**Reply:** Thank you for the suggestion. We believe that this paragraph contributes to the flow of the discussion and is an integral part of it. However, we renamed the section to “discussion and summary”.

Line 399: the word is is missing: “noteworthy to mention is that...”

**Reply:** Added, line 424. Thank you.

Line 404: when using the GMM acronym, the word model is redundant.

**Reply:** Corrected, line 430. Thank you.

Line 406: define IM.

**Reply:** Definition added, lines 170-171. Thank you.

Line 419: “four simulated ground motions datasets” – the s of the plural for ground motion should be omitted.

**Reply:** Corrected, line 448. Thank you.

# Ground motions variability in Israel from 3-D simulations of M 6 and M 7 earthquakes

Jonatan Glehman<sup>1</sup> and Michael Tsesarsky<sup>1,2</sup>

<sup>1</sup>Department of Earth and Environmental Sciences, Ben Gurion University of the Negev, 8410501, Israel

<sup>2</sup>Department of Civil and Environmental Engineering, Ben Gurion University of the Negev, 8410501, Israel

Correspondence to: Jonatan Glehman (glehman@post.bgu.ac.il)

**Abstract.** In Israel, due to low seismicity rates and sparse seismic network, the temporal and spatial coverage of ground motion data is insufficient to estimate the variability of moderate-strong ( $M > 6$ ) ground motions required to construct a local ground motion model (GMM). To fill this data gap and to study the ground motions variability of  $M > 6$  events, we performed a series of 3-D numerical simulations of M 6 and M 7 earthquakes. Based on the results of the simulations, we developed a parametric attenuation model (AM) and studied the residuals between simulated and AM PGVs and the single station variability. We also compared the simulated ground motions with a global GMM in terms of peak ground velocity (PGV) and significant duration ( $D_s$  595). Our results suggested that the AM was unable to fully capture the simulated ground motions variability, mainly due to the incorporation of super-shear rupture and effects of local sedimentary structures. We also showed that an imported GMM considerably deviates from simulated ground motions. This work sets the basis for future development of a comprehensive GMM for Israel, accounting for local sources, path, and site effects.

## 1 Introduction

The recent report by the Centre for Research on the Epidemiology of Disasters (CRED) and the UN Office for Disaster Risk Reduction (UNDRR) – Human Cost of Disasters, 2000 - 2019 – clearly shows that earthquakes are the deadliest natural disasters. accounting for only 3 % of the total number of people affected by natural disasters, they count for 58 % of deaths (more than 700,000) of all disaster types and 21 % of recorded economic losses (Mizutori and D’ebarati, 2020). Over the past 40 years, the global population exposed to a moderate to severe intensity earthquake has increased by 93 % (to 2.7 billion people) (Pesaresi et al., 2017). This value is expected to grow with population growth and increasing urbanization.

Seismic hazard is the intrinsic natural occurrence of earthquakes and the resulting ground motion and other effects (Wang, 2005). Ground motion models (GMM’s) are critical components in the mitigation of seismic hazard. Empirically based GMMs, also known as Ground Motion Prediction Equations (GMPE’s), are parametric models that estimate the median and the variability of the expected ground motions at a site. The main explanatory variables of such models are typically earthquake magnitude, distance, and site conditions. New generation GMMs also address faulting style, depth to rock, and others.

Many regions worldwide, either due to low seismicity rates and/or sparse coverage of the seismic network, do not provide sufficient temporal and spatial data to estimate the variability of ground motions required to construct a local GMM or validate an imported GMM to local conditions. This situation is specifically acute in the range of strong earthquakes at relatively short distances that pose the most significant hazard to human life and infrastructure.

37           The use of imported GMM's under the ergodic assumption attributes the ground motion variability to the  
38 randomness of the process (i.e., aleatory variability) rather than to local systematic source-path and site effects  
39 (i.e., epistemic uncertainty) (Anderson and Brune, 1999). Abrahamson et al., (2019) showed that the increased  
40 number of strong-motion records over the past decade exhibit significant differences in scaling of the ground  
41 motions even within relatively small regions and that most of the variability typically treated as aleatory is actually  
42 due to systematic source, path, and site effects. Kuehn et al., (2019) showed the importance of variations in quality  
43 factor (Q) over small spatial scales (30 km) in California. Specifically showing that accounting for path effects  
44 leads to a smaller value of the aleatory variability and results in different median predictions, depending on source  
45 and site location. To achieve this improvement, Kuehn et al., (2019) divided California into a grid with a cell size  
46 of 30 km by 30 km and used 12,039 records from 274 events recorded at 1504 stations. This approach can be  
47 employed only in data-rich regions, such as California. Lan et al., (2019) showed that for South Western China,  
48 imported GMM's result in significant discrepancies compared with regional instrumental data (including the  
49 Wenchuan Mw 7.9 event). In addition, despite the recorded ground motion data expanding, it remains sparse for  
50 large, complex ruptures with recurrence intervals generally exceeding the observation length of instrumental  
51 records.

52           The challenges met while predicting ground motion in data-poor regions turn numerical modeling into an  
53 essential complementary method for seismic hazard analysis (Chaljub et al., 2010). Numerical modeling alleviates  
54 the need for the ergodic assumption, as it can augment the seismic data with strong motion records and account  
55 for ground motions variability by systematically separating source, path, and site effects. For example, Graves et  
56 al., (2011) showed that the combination of rupture directivity and basin response effects could lead to an increased  
57 hazard in particular sites, relative to that calculated by GMM. Pitarka et al., (2021) found that the combination of  
58 rupture propagation effects with the amplification due to local topography can result in large ground motions  
59 amplifications with complex spatial variability.

60           However, the shift from ergodic models to nonergodic models, which account for local source-site and  
61 path effects such as numerical models, leads to large epistemic uncertainty in the median ground motion, resulting  
62 in increased epistemic uncertainty of the hazard (Walling and Abrahamson, 2012). Such uncertainty is derived  
63 from both modeling and parametric uncertainties, as the model, is not well constrained. Model uncertainty can be  
64 reduced by using more accurate 3D crustal models and source models.

65           Subsurface models with different levels of accuracy and completeness are available around the world. With  
66 the increasing use of terrestrial and space geodesy, the control of seismic sources is also improving with time.  
67 Combining the two enables the construction of numerical models for regional assessment of ground motions  
68 (Pitarka et al., 2021; Douglas and Aochi, 2008; Graves and Pitarka, 2015). A hybrid GMM, based on empirical  
69 and synthetic ground motion databases, is expected to reduce the epistemic uncertainty of the median ground  
70 motion and will lead to a lower aleatory variability than GMM's based on data with limited magnitude and distance  
71 bands.

72           In Israel, low seismicity rates (centennial and millennial return periods) and a limited instrumental catalog,  
73 spanning only four decades and contain mainly  $M < 6$  events, impede the development of local empirical GMM.  
74 The practical outcome of this shortcoming is the use of imported GMM's, such as the Campbell & Bozorgnia,  
75 (2008) used in the Israel Seismic Design Code IS 413 (Israel Standards Institution, 2013). Contrary to the



76 instrumental catalog, the Israel pre-instrumental catalog spans over three millennia (Agnon, 2014), including  
77 numerous  $M > 6$  events, with up to 14  $M > 7$  events.

78 This paper presents numerical modeling of ground motions in Israel, intended to narrow the strong ground  
79 motion data gap and study ground motions variability from moderate ( $M 6$ ) and strong ( $M 7$ ) earthquakes. We  
80 begin with a brief introduction to the seismo-tectonic setting of the region. Then, we proceed to the methodology  
81 section to describe the process of generating a synthetic ground motion database and the subsequent construction  
82 of a parametric ground motion model. The results section presents the simulated ground motions and the respective  
83 attenuation model. Then, it compares it with the global GMM's of Campbell & Bozorgnia, (2014; hereafter,  
84 CB14) and Afshari & Stewart, (2016) performance with respect to the synthetic database. Finally, we discuss our  
85 findings and provide insights regarding the seismic hazard from moderate to strong earthquakes and the  
86 importance of developing a comprehensive regional GMM to mitigate the seismic hazard in Israel.

## 87 **2 The seismo-tectonic setting of Israel**

### 88 **2.1 Seismicity and seismic hazard in Israel**

89 The Dead Sea Transform (DST) fault system is an active tectonic boundary separating the African and Arabian  
90 plates. Extending from the Gulf of Aqaba to southern Turkey, a total length of approx. 1100 km, it dominates the  
91 seismicity of Israel, Palestinian Authority, Lebanon, and Syria (Fig. 1a,b). The DST is a left-lateral strike-slip  
92 fault with a total offset of 105 km (Garfunkel, 2014). The average long-term slip rate is 4 to 5 mm year<sup>-1</sup> (Bartov  
93 et al., 1980). Geodetic slip rates along the Israeli part of the DST range from 3 to 5 mm year<sup>-1</sup> (Hamiel et al., 2016;  
94 Sadeh et al., 2012).

95 Splaying north-west from the DST is the Gilboa Fault, and farther north-west towards the Mediterranean,  
96 the Carmel Fault. Both comprise an active zone generalized as the Carmel Fault Zone (CFZ). The DST segments  
97 are capable of producing  $M 6$  and  $M 7$  events (Shamir et al., 2001), and the CFZ is capable of producing up to  $M$   
98 6.5 earthquakes (Grünthal et al., 2009).

99 The Israel Seismic Network (ISN), established in 1983 and upgraded over the years, consists of a mixture  
100 of different instrumental and operational stations, including short-period stations (24 in total), broadband stations  
101 (14 in total), and a large broadband array (part of the Comprehensive Nuclear Test Ban Treaty). The deployment  
102 of the ISN does not cover areas of increased seismic hazard, e.g., densely populated zones and soil sites, or areas  
103 designated by the Israel Seismic Code (IS413) as suspected in extreme ground motion amplification, such as the  
104 Zevulun Valley (Fig. 1b). Currently, the seismic network is upgraded within the Tru'a project (an early warning  
105 system), with up to 60 strong-motion accelerometers and 12 broadband seismometers added to ISN (Kurzon et  
106 al., 2020). However, most of the instrumentation are placed along the DST and Carmel fault to provide early  
107 warning, and not in densely populated or industrialized areas where the seismic risk is tangible. Based on  
108 demographic projections (the Taub Center for Social Policy Study in Israel; For URL see data and resources) the  
109 population of Israel is expected to grow from 9.05 million in 2021 to 12.8 million in 2040 and combined with the  
110 increasing demand for housing and infrastructures, the seismic risk is expected to grow.

111 The Israel seismic catalog covers 36 years of measurements (1985–2021) and includes more than 23,300  
112 events (Wetzler & Kurzon,2016), but only 15 of them are of  $M > 5$  (Fig. 1a and Fig. 2). Moving back in time,  
113 Israel's pre-instrumental catalog spans over 3000 years (Agnon, 2014; Zohar, 2019) with many catastrophic

114 events, such as the 749 ( $M > 7$ ), 1202, ( $M > 7.5$ ), 1759 ( $M > 7$ ), and the 1837 ( $M > 7$ ) earthquakes, among others.  
 115 In total, fourteen  $M > 7$  events were cataloged by Ambraseys (2006) in the past two millennia. Recent geodetic  
 116 studies (Hamiel et al., 2016; Sadeh et al., 2012) identified a slip deficit on specific segments of the DST, such as  
 117 the Jordan Gorge Fault (JGF) and the Jordan Valley Fault (JVF), equivalent to an  $M > 7$  earthquake.

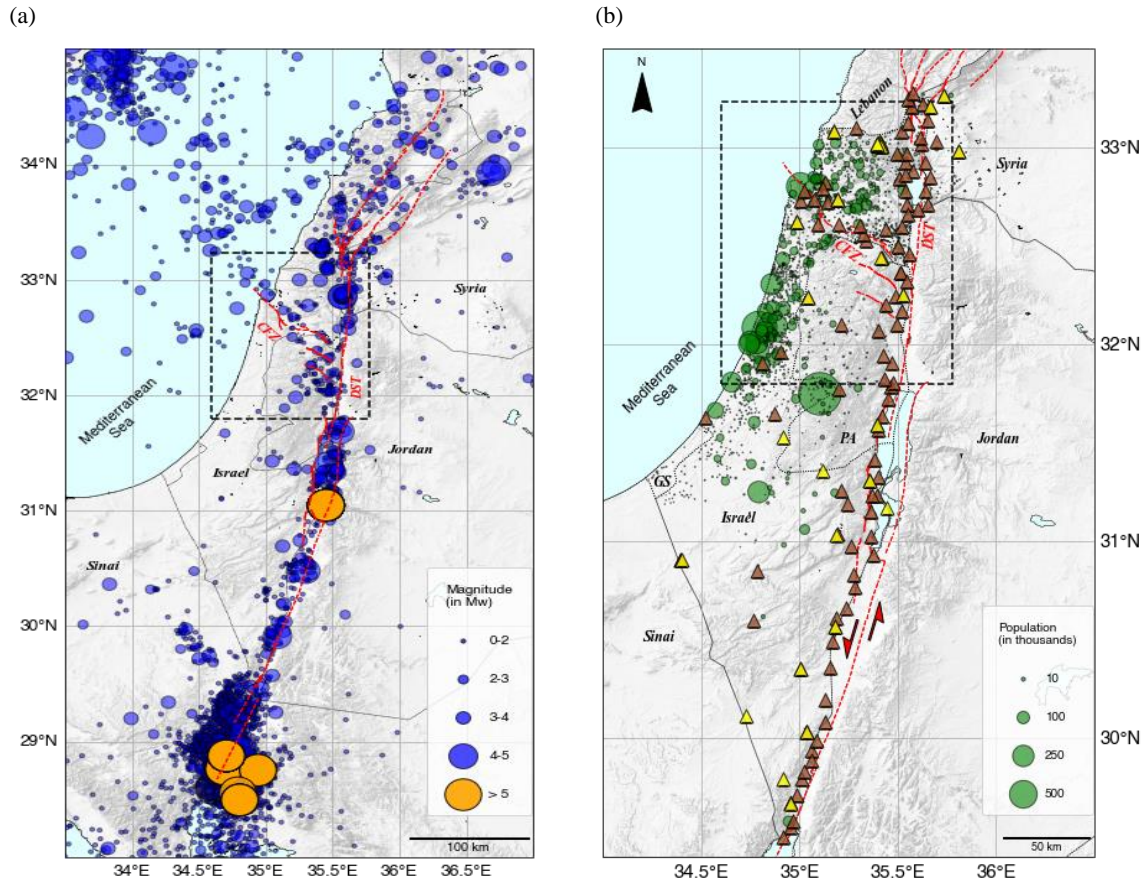

118 **Figure 1.** (a) Israel Seismic catalog ( $M_w$ ) for the period 1985-2021 orange circles are events with  $M_w > 5$  (expansion of  
 119 Wetzler & Kurzon (2016) catalog). Red lines are active tectonic borders and faults, DST is Dead Sea Transform, CFZ is  
 120 Carmel Fault Zone. (b) Demographics of Israel and the Palestinian Authority and the deployment of the Israel Seismic  
 121 Network. Yellow triangles are the old (up to October 2017) Israel Seismic network stations, brown triangles are the current  
 122 (Tru'a) seismic network stations. (after Kurzon et al., (2020)). GS is Gaza Strip. The black rectangles define the computational  
 123 domain presented in Fig. 3a.

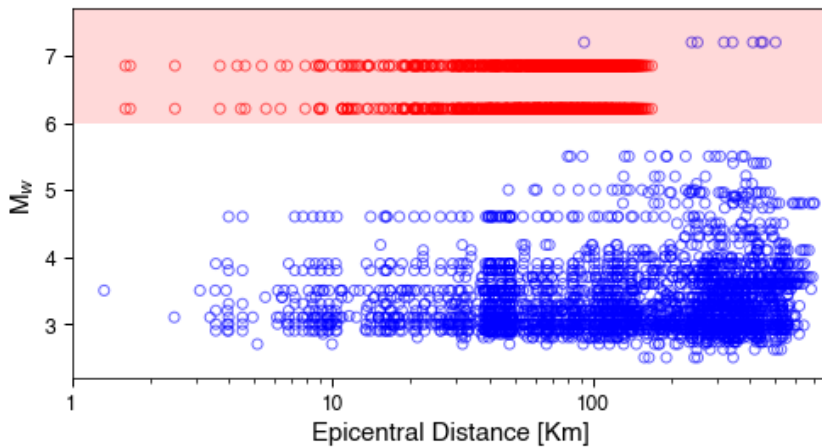

124  
 125 **Figure 2.** Israel's ground motion database (blue circles) for the period 1983-2021 as a function of epicentral distance (Yagoda-  
 126 Biran et al., 2021). The shaded rectangle spans the  $M_w > 6$  region of moderate-strong ground motion records. The red circles  
 127 are the simulated ground motions from this work.

## 128 2.2 Spatial heterogeneity of Israel

129 The geological structure of Israel exhibits strong spatial heterogeneity over short scales (Fig. 3a,b). Deep pull-  
 130 apart basins (up to 10 km) filled with soft sediments ( $V_s \sim 600\text{-}800$  m sec<sup>-1</sup>) accompany the active DST system,  
 131 from south to north: The Dead Sea Basin, Beit Shean Valley (BSV), the Sea of Galilee (SG) and the Hula Valley.  
 132 Along the CFZ, the Zevulun, Harod, and Jezreel Valleys are formed. The vulnerability of Zevulun Valley is  
 133 particularly crucial because of its dense population and the high concentration of strategic industrial infrastructure  
 134 (Shani-Kadmiel et al., 2020).

135 The Israeli coastal plain, one of the most densely populated regions of the country (on average, 9000 people  
 136 per km<sup>2</sup>), is underlain by a westward thickening sedimentary wedge (SW). In the Judea foothills area, east of the  
 137 SW, a strong reflector exists between the sandstones and clays (Pleistocene Kurkar Gr,  $V_s \sim 300$  m sec<sup>-1</sup>) and the  
 138 hard carbonate rocks (the Cretaceous Judea Gr.,  $V_s \sim 2000$  m sec<sup>-1</sup>). In the coastal plain, the Kurkar Gr. overlays  
 139 the soft carbonates (Avedat Gr,  $V_s \sim 900$  m sec<sup>-1</sup>) and clastic sediments (the Bet Guvrin Fm.,  $V_s \sim 800$  m sec<sup>-1</sup>)  
 140 (refer to Fig. 3b). The depth of the Kurkar Gr. base reflector is typically several tens of meters. Further to the west,  
 141 a prominent reflector is a contact between the clays (Pliocene Yafo Fm.,  $V_s \sim 600$  m sec<sup>-1</sup>) and top of Judea Gr.  
 142 These two reflectors, when shallower than 250 m, were used for the latest update of the Israel Building Code IS  
 143 413 (Israel Standards Institution, 2013) to delineate areas of high potential of ground motion amplification  
 144 (Gvitzman and Zaslavsky, 2009). This situation further complicates the process of developing an empirical GMM  
 145 for Israel.

## 146 2.3 Source effects

147 The impact of inter-basin sources along the DST on regional ground motions was examined by Shimony et al.,  
 148 (2021). This work clearly showed that regional ground motions are determined by source-path coupling effects in  
 149 the strike-slip basins before waves propagate into the surrounding areas. Ground motions are determined by the  
 150 location of the rupture nucleation, the near-rupture lithology, and the local structures. Shimony et al., focused on  
 151 symmetric sub-shear ruptures and did not model rupture directivity or super-shear rupture velocities, both known  
 152 to amplify regional ground motions.

153 Under specific conditions, super-shear ruptures and directivity occur on bi-material faults (Shi & Ben-Zion  
 154 2006). Specifically, for subsonic propagation, symmetrically initiated bilateral rupture evolves after some  
 155 propagation distance to a unilateral rupture in the positive direction, which is the direction of slip on the compliant  
 156 side of the fault containing the softer layer. The magnitude of this effect increases with propagation velocity and  
 157 the degree of material contrast across the fault. At super-shear propagation speeds, along a bi-material fault, the  
 158 propagation direction is reversed.

159 The DST is a mature left-lateral fault with a 105 km offset, resulting in strong material contrast between  
 160 the hard layers on the Jordan side (east) and the soft layers on the Israeli side (west). Thus, the rupture can  
 161 potentially propagate unilaterally southwards, discharging most of the seismic energy into Israel or northward in  
 162 super-shear mode. The Jordan Gorge Fault and the Jordan Valley Fault (both active faults of the DST) specifically  
 163 can produce an earthquake with rupture propagating in super-shear velocity since they border deep sedimentary  
 164 basins, characterized by large shear wave velocities contrast along the rupture propagation path. Thus, to quantify  
 165 the seismic hazard ensuing from bi-material faults, it is necessary to study the two propagation directions; both  
 166 sub-shear and super-shear velocities.

167 The primary purpose of this study is to examine different source, path, and site effects of simulated,  
 168 moderate M 6 and moderate-strong M 7 earthquakes and their contribution to ground motion variability. To this  
 169 end, we simulated M 6 and M 7 earthquakes with different source and path properties. Then, we developed a  
 170 parametric representation of median ground motions and their variability. Formulated in terms of a single ground  
 171 motion intensity measure (IM), Peak Ground Velocity (PGV), our model quantifies the spatial distribution of the  
 172 ground motions in central and northern Israel, accounting for local source, path, and site effects, including rupture  
 173 velocity and directivity.

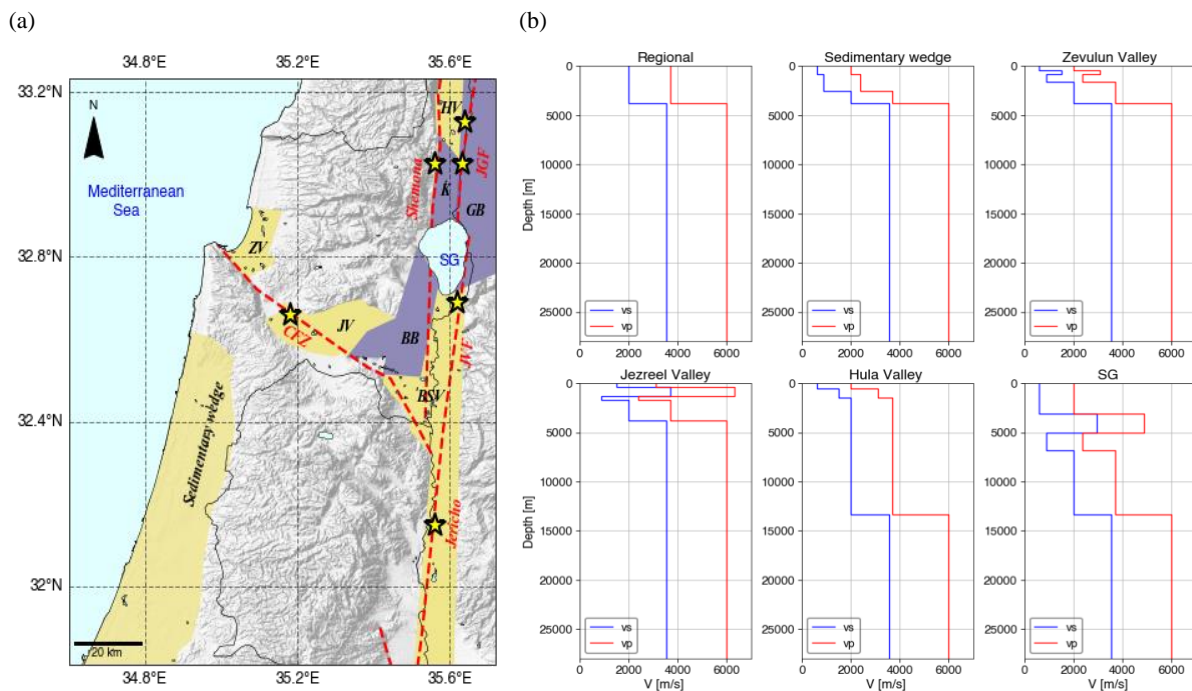

174 **Figure 3.** (a) The DST fault system and the Carmel Fault Zone (CFZ) and accompanying structures. Sedimentary structures  
 175 (yellow): BSV-Beit Shean Valley, ZV-Zevulun Valley, JV-Jezreel Valley, HV-Hula Valley, SG-Sea of Galilee, and the  
 176 Sedimentary wedge; and hard rock structures (purple): K-Korazim structural saddle, BB-Belvoir Basalts, GB-Golan Basalts.

177 The yellow stars indicate the epicenter of the seismic sources simulated in our work: Jordan Gorge Fault (JGF), with bilateral  
178 and unilateral slip realization, Jordan Valley Fault (JVF), Jericho Fault, Shemona Fault (only for M 7), and CFZ (only for M  
179 6). (b) Representative depth velocity profiles of the computational domain.

### 180 **3 Methodology and workflow**

181 Developing a regional GMM for Israel requires a database of ground motion records, including  $M > 6$  events at  
182 short,  $<100$  km, distances. To supplement the existing ground motions database, we added a suite of synthetic  
183 ground motions from physics-based 3D numerical models of different M 6 and M 7 earthquakes (Fig. 2).

184 Our work comprised two main stages; first, we modified and expanded the regional velocity model of  
185 Shimony et al., (2021), to represent a more realistic geological setting and contain the Golan Basalts, the central  
186 part of Israel, and the sedimentary wedge. Then, we simulated five different earthquake scenarios for each  
187 magnitude, with nucleation at different locations along the DST and CFZ. For each scenario, we recorded synthetic  
188 ground motions at 129 stations (see supplementary material, Fig. S1). Next, we performed statistical analysis of  
189 the synthetic database, using multivariable regression, by minimizing residuals between data and model  
190 estimations. We then formulated a parametric model of the ground motions and examined its consistency with the  
191 simulated database, in terms of the median ground motions and their variability for each of the simulated scenarios.

#### 192 **3.1 Numerical model**

193 Ground motions in this research were modeled using the SW4v2 software (Pettersson and Sjogreen, 2014, 2017a,  
194 b), developed for large-scale simulations of seismic wave propagation on parallel computers.

195 The velocity model covers the northern and central part of Israel (fig. 4a) and includes the main DST trough  
196 and the following basins/structures, from south to north: Beit Shean Valley (BSV), Belvoir Basalts (BB), Sea of  
197 Galilee (SG), Korazim structural saddle (K), Golan Basalts (GB) and Hula Valley (HV). Along the CFZ, we model  
198 the major sedimentary basins of Jezreel Valley (JV) and Zevulun Valley (ZV). The coastal plain is underlain by  
199 the westward thickening Sedimentary wedge (SW). Geographically, the model extends from the city of Ashdod  
200 in the south ( $31.8^\circ$  N,  $34.6^\circ$  E) to Hula Valley in the north ( $33.23^\circ$  N,  $35.72^\circ$  E) and from the Mediterranean Sea  
201 in the west to the Golan Basalts in the east. Figures 4b,c,d illustrate the north-south and east-west cross-sections  
202 of the velocity profiles. The numerical domain spans 159 km in the north-south direction and 124 km in the east-  
203 west direction. It covers almost 80 % of the Israeli population and a significant part of the population of the  
204 Palestinian Authority.

205 Subsurface geometry and the characteristics of the DST trough were obtained from Rosenthal et al., (2019)  
206 with modifications for the Hula Valley, obtained from the density log of the Notera 3 (Rybakov et al., 2003). The  
207 sedimentary wedge structure retrieved from Gvirtzman et al. (2008) and the Zevulun Valley structure was set  
208 using data from Gvirtzman et al. (2011). The basement depth along the model is based on Ben-Avraham et al.,  
209 (2002). Five physical quantities describe the viscoelastic material model used in this research: shear wave velocity  
210 ( $V_s$ ), pressure wave velocity ( $V_p$ ), density ( $\rho$ ), and seismic quality factors ( $Q_s$ ,  $Q_p$ ) for each point in the  
211 computational space. The missing parameters were assessed indirectly by using the correlation presented by  
212 Brocher (2008). The main units with their respective velocity, density and quality factors are shown in Table 1.

213 Seismic sources were modeled using the distributed slip model (DSM) developed by Shani-Kadmiel et al.,  
214 (2016). DSM is a kinematic model which describes the rupture patch as an elliptic surface with maximum slip at

215 the nucleation point, decaying toward the edges as a pseudo-Gaussian function (Fig. S2). Rupture patch size and  
216 displacements were scaled following the relations presented in Wells & Coppersmith (1994). All sources were  
217 modeled as left-lateral, vertical strike slips (a dip of  $90^\circ$  and rake of  $0^\circ$ ), with a strike of  $3^\circ$  for sources on the  
218 DST and a strike of  $325^\circ$  for the CFZ. The moment-rate time function of each point on the rupture patch was set  
219 to a GaussianInt pulse (Petersson and Sjogreen, 2017b) with a central frequency of  $f_0=0.4$  Hz and a maximum  
220 frequency of  $f_{\max}=1$  Hz.

221 The depth of the model was set to 28 km corresponding to the maximum seismogenic depth in this region  
222 (Wetzler and Kurzon, 2016). We assigned a minimum shear wave velocity of  $608 \text{ m s}^{-1}$  for the uppermost  
223 sedimentary layer due to the computational limitations of our system. Grid spacing was set to 76 m in accordance  
224 with the minimum shear wave velocity and the maximum frequency of the source. We set the simulation time to  
225 120 seconds to allow the slowest waves to propagate across the entire computational domain. The main parameters  
226 of the numerical setting are summarized in Table 2.

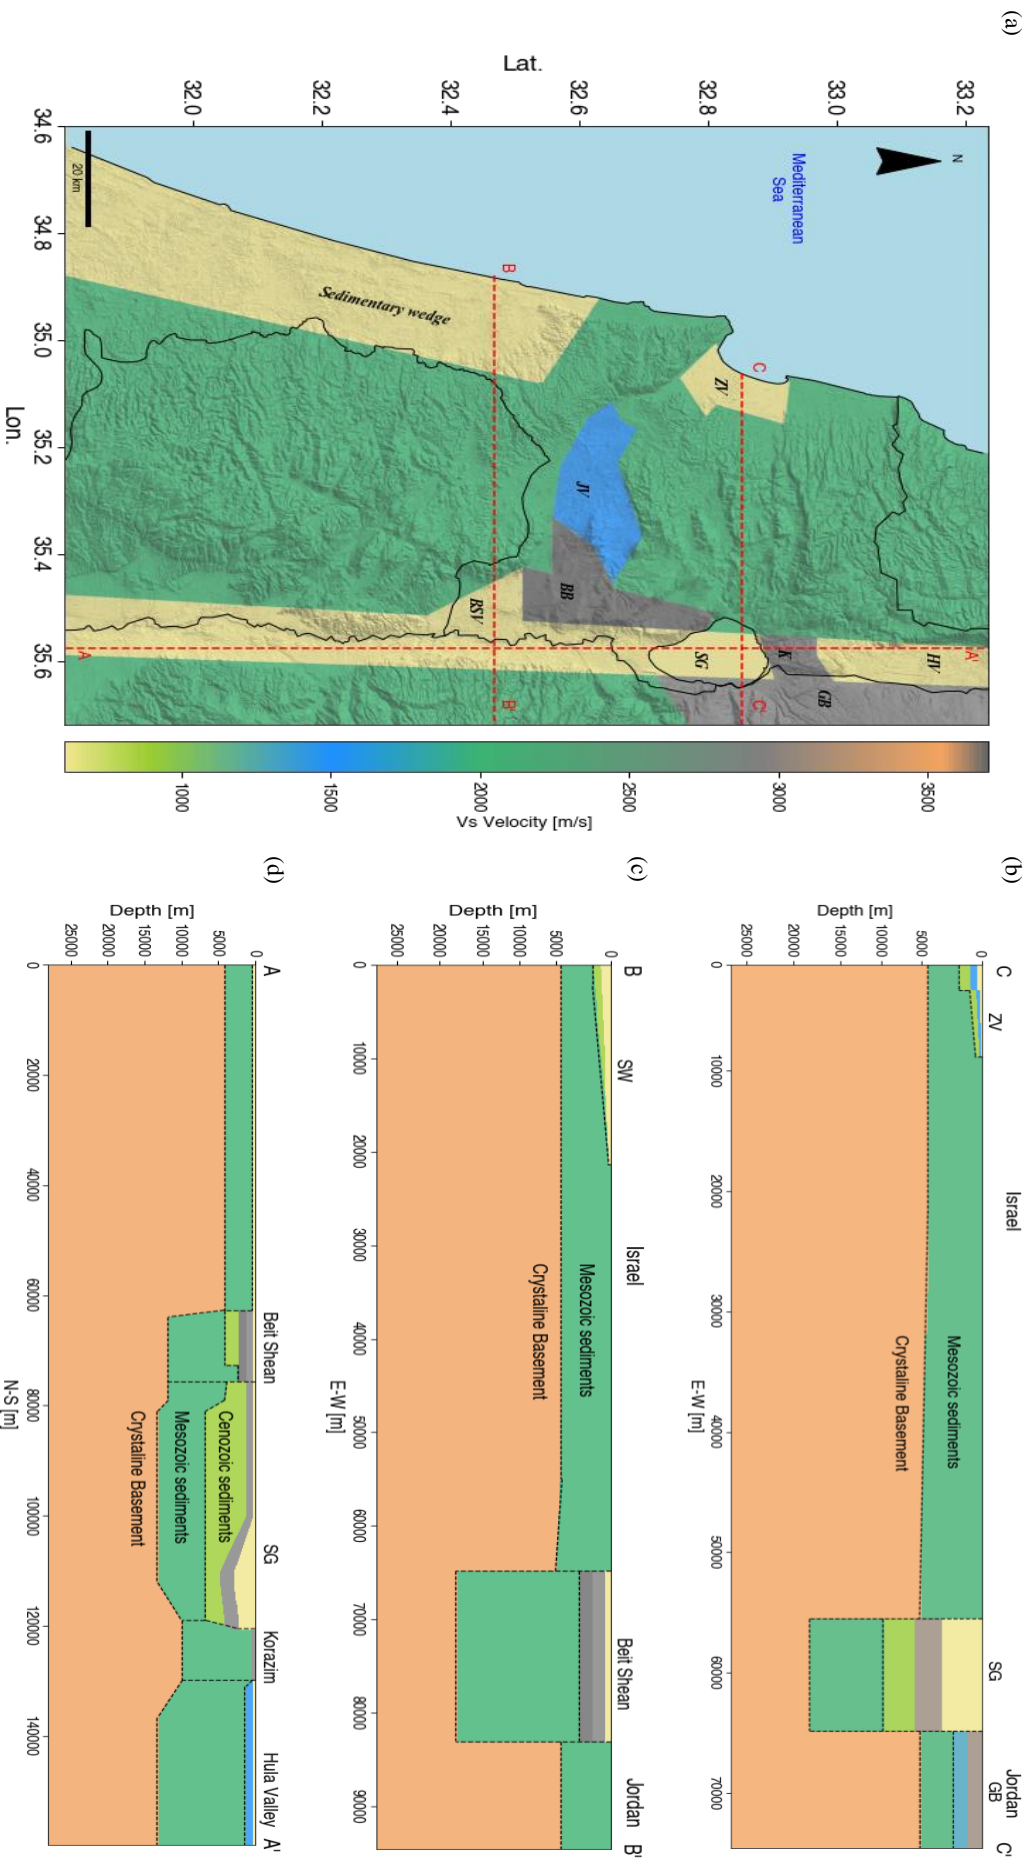

**Figure 4.** (a) The numerical model of the computational domain accompanied with subsurface cross-sections, marked with red dashed lines: (b) east-west cross section through the Sedimentary Wedge, BB' and (d) north-south cross section through Zevulun Valley, CC' (c) east-west cross-section through the Sedimentary wedge, BB' and (d) north-south cross-section through the DST trough, AA'.

**Table 1.** Material properties of main stratigraphic units used in this work

| Model part        | Rock Formation                                                                             | Vs<br>[m s <sup>-1</sup> ] | Vp<br>[m s <sup>-1</sup> ] | Qs    | Qp    | ρ [Kg m <sup>-3</sup> ] |
|-------------------|--------------------------------------------------------------------------------------------|----------------------------|----------------------------|-------|-------|-------------------------|
| Regional          | Crystalline basement                                                                       | 3550                       | 6000                       | 403   | 806   | 2720                    |
|                   | Cenozoic and Mesozoic sediments (Judea/ Talme Yafe, Mount Scopus Avedat, and Lower Saqiye) | 2000                       | 3700                       | 160   | 320   | 2350                    |
| Local variations: |                                                                                            |                            |                            |       |       |                         |
| DST               | Cenozoic sediments (Umm Sabune, Bira and Gesher)                                           | 887                        | 2380                       | 62    | 124   | 2054                    |
|                   | Miocene volcanics (lower basalt)                                                           | 3698                       | 6330                       | 439.5 | 879   | 2790                    |
|                   | Pliocene volcanics (upper basalt)                                                          | 2947                       | 4900                       | 282   | 564   | 2520                    |
|                   | Notera/Lisan                                                                               | 608                        | 2000                       | 39.87 | 79.74 | 1900                    |
| Hula              | Cenozoic sediments                                                                         | 1500                       | 3100                       | 111.5 | 223   | 2245                    |
|                   | Notera/Lisan                                                                               | 608                        | 2000                       | 39.87 | 79.74 | 1900                    |
| JV                | Cenozoic sediments (Umm Sabune, Bira, and Gesher)                                          | 887                        | 2380                       | 62    | 124   | 2054                    |
|                   | Miocene volcanics (lower basalt)                                                           | 3698                       | 6330                       | 439.5 | 879   | 2790                    |
|                   | Cenozoic sediments                                                                         | 1500                       | 3100                       | 111.5 | 223   | 2245                    |
| ZV                | Cenozoic and Senonian sediments (Mount Scopus Avedat and Beit Guvrin)                      | 887                        | 2380                       | 62    | 124   | 2054                    |
|                   | Cenozoic sediments (Patish)                                                                | 1500                       | 3100                       | 111.5 | 223   | 2245                    |
|                   | Cenozoic sediments (Kurkar and Yafo)                                                       | 608                        | 2000                       | 39.87 | 79.74 | 1900                    |
| SW                | Cenozoic sediments (Lower Saqiye)                                                          | 887                        | 2380                       | 62    | 124   | 2054                    |
|                   | Cenozoic sediments (Kurkar and Upper Saqiye)                                               | 608                        | 2000                       | 39.87 | 79.74 | 1900                    |

**Table 2.** Main parameters of the numerical model

| Parameters                                                         | Value                                                                                |
|--------------------------------------------------------------------|--------------------------------------------------------------------------------------|
| Model Dimensions (L×W×D)                                           | 159.63 Km × 124.45 Km × 28 Km                                                        |
| Spatial spacing (dh)                                               | 76 m                                                                                 |
| Grid size (points)                                                 | $1.27 \times 10^9$                                                                   |
| Time step spacing                                                  | 0.0125 s                                                                             |
| Simulated time                                                     | 120 s                                                                                |
| Source Dimensions (L×D)                                            | M 6: 32 Km × 15 Km<br>M 7: 38 Km × 22 Km                                             |
| Source maximum and average slip                                    | M 6: 0.5 and 0.2 m<br>M 7: 3 and 1.57 m                                              |
| Seismic moment ( $M_0$ )                                           | M 6: $2.57 \times 10^{18}$ N·m (Mw 6.21)<br>M 7: $2.37 \times 10^{19}$ N·m (Mw 6.85) |
| Source fundamental ( $f_0$ ) and maximal frequencies ( $f_{max}$ ) | 0.4 and<br>1 Hz                                                                      |

### 3.2 Earthquake scenarios and database

To examine the variability of ground motions from moderate M 6 and strong M 7 earthquakes, we concentrated

on earthquake events nucleating on active segments of the DST system, with known slip deficit, and along the



233 CFZ. We modeled a symmetric bilateral rupture on the Jordan Gorge Fault (JGF-B), Jericho Fault (JF) Carmel  
 234 Fault Zone (CFZ) and the Shemona Fault (SF), a southward unilateral rupture on the JGF (JGF-U), and a super-  
 235 shear rupture on the Jordan Valley Fault (JVF) (Fig. 3).

236 The hypocenter for the DST events was placed in the middle of the seismogenic depth; 11 and 13 Km, for  
 237 the M 6 and M 7 respectively, for the M 6 CFZ, the value was set to 12 Km. The rupture patch was designed to  
 238 be contained in uniform lithology to prevent super-shear rupture speeds in the shallow parts of our model.  
 239 Therefore, rupture speed for each scenario was set to  $0.9 V_S$  of the lithology surrounding the nucleation zone. The  
 240 only exception was the JVF scenario for both M 6 and M 7, in which we modelled super-shear effects. The rupture  
 241 velocity of each scenario corresponds to the local variations of the sediment's depth. Following the transition of  
 242 the nucleation zone from the shallow crystalline basement in the south and west parts of the model to the thick  
 243 Mesozoic and Cenozoic sediments in the north and the east, the rupture velocity decreases from  $3195 \text{ m s}^{-1}$  along  
 244 the Shemona, Carmel, and Jericho faults to  $1800 \text{ m s}^{-1}$  along the JGF and JVF faults. As a reference, we simulated  
 245 a simple two-layered reference model (Ref) on the JGF, with mechanical properties similar to the regional setting,  
 246 following Aldersons et al., (2003). The scenarios are summarized in Table 3.

247 **Table 3.** Earthquake scenarios

| <b>Fault Name</b> | <b>Scenario</b>                      | <b>Magnitude<br/>(M)</b> | <b>Rupture<br/>speed (<math>\text{m s}^{-1}</math>)</b> | <b>Hypocentral<br/>depth (Km)</b> |
|-------------------|--------------------------------------|--------------------------|---------------------------------------------------------|-----------------------------------|
| Jordan Gorge      | Bilateral rupture (JGF-B)            | 6, 7                     | 1800                                                    | 11 and 13                         |
| Jordan Gorge      | Southward unilateral rupture (JGF-U) | 6, 7                     | 1800                                                    | 11 and 13                         |
| Jordan Valley     | Bilateral super-shear rupture (JVF)  | 6, 7                     | 1800                                                    | 11 and 13                         |
| Jericho           | Bilateral rupture (JF)               | 6, 7                     | 3195                                                    | 11 and 13                         |
| Shemona           | Bilateral rupture (SF)               | 7                        | 3195                                                    | 13                                |
| Carmel            | Bilateral rupture (CFZ)              | 6                        | 3195                                                    | 12                                |
| Reference         | Bilateral rupture (Ref)              | 6, 7                     | 3195                                                    | 11 and 13                         |

## 248 **4 Results**

249 In this section, we report the simulation results and the simulation-based attenuation model for M 6 and M 7. We  
 250 begin with elaborating on the regression process and its deliverable, the attenuation model. Next, we show the  
 251 correspondence of the model with the simulated database in terms of PGV residuals and examine the contribution  
 252 of each earthquake scenario to the total deviation. Then, we proceed with looking into single station variability,  
 253 through maps of the predicted and simulated PGV, with the corresponding residuals at each station. Finally, we  
 254 examine the PGV and the 5 %- 95 % ground motions significant duration (Ds 595) correspondence between  
 255 predicted by global GMM's (CB14, Afshari & Stewart, 2016, respectively) and simulated.

### 256 **4.1 Simulation results**

257 For each simulation, we attained a set of 129 synthetic ground motion records (3 components each; N-S, E-W,  
 258 and vertical) from the network deployed in the computational domain. Next, we calculated the PGV values for  
 259 each scenario at each station as the maximum value over the three components. We decided to exclude some of

260 the M 7 near-source records (stations: 104,105 and 106 for the JVF scenario and stations: 122,123 and 129 for the  
 261 JGF-B, JGF-U, and Shemona scenarios) due to high strain values and possible non-linear effects, not compatible  
 262 with the linearity assumption of our model. In total, our ground motions database consists of 645 and 633 synthetic  
 263 records for M 6 and M 7, respectively. Figure 5 presents our results in terms of PGV as a function of distance. We  
 264 use different markers for records from the sedimentary structures of the Zevulun Valley and the Sedimentary  
 265 wedge to differentiate them from the remaining data.

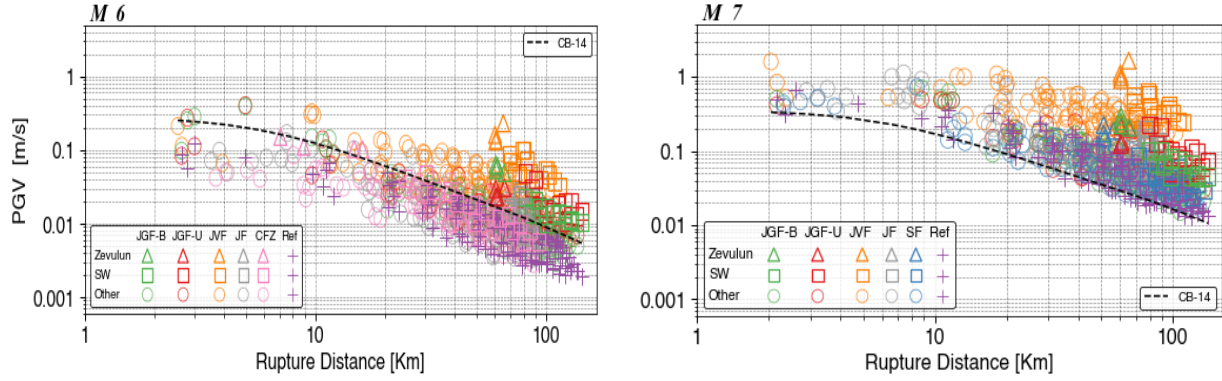

266 **Figure 4.** Simulation results, PGV-distance space, for bilateral rupture on the Jordan Gorge Fault (JGF-B), Jericho Fault (JF)  
 267 Carmel Fault Zone (CFZ; for M 6) and the Shemona Fault (SF; for M 7), a southward unilateral rupture on the JGF (JGF-U),  
 268 and a super-shear rupture on the Jordan Valley Fault (JVF); for M 6 (left) and M 7 (right). The records from Zevulun Valley  
 269 and the Sedimentary wedge (SW) are marked with triangles and rectangles, respectively. The other records are marked with  
 270 circles; the reference records are marked with pluses. For comparison, the CB-14 is plotted for a strike-slip fault,  $Z_{2.5}=0.42$   
 271 Km and  $V_{S30}=1686$  m/s (representing averaged values over all the sites).

## 272 4.2 Statistical analysis of ground motions results

273 The next step was to formulate a parametric ground motion attenuation model (AM) for the two magnitudes based  
 274 on our simulations. Such a model will provide an estimate for the median ground motions and their variability.  
 275 The general parametric form of the AM for both M 6 and M 7 is presented in Eq. (1):

$$276 \ln Y = a \ln \left( \sqrt{R_{RUP}^2 + b} \right) + c \ln \left( \frac{V_{S,surf}}{V_{S,ref}} \right) + d Z_2 + e \pm \sigma \quad (1)$$

277 Where Y is ground motion parameter. Due to the bandwidth of our numerical models (0.1 to 1 Hz), we formulated  
 278 the AM in terms of PGV. We use the closest distance to the fault rupture plane ( $R_{RUP}$  as defined in CB14) as the  
 279 initial explanatory variable. To improve the accuracy of the model, we incorporated two additional variables into  
 280 the regressions: surface shear wave velocity at the site ( $V_{S,surf}$ ) and the depth to  $V_S = 2 \text{ km s}^{-1}$  ( $Z_2$ ), which is the  
 281 depth to the hard Mesozoic sediments (top Judea Gr.) considered the primary reflector in the region.  $a$ ,  $b$ ,  $c$ ,  $d$ , and  
 282  $e$  are model coefficients, and  $\sigma$  is the standard deviation. The  $V_{S,ref}$  is the shear wave velocity corresponding to  
 283 the Judea Gr. in the computational domain, which in our model equals  $2000 \text{ m s}^{-1}$ .

284 The process of minimizing the residuals as a function of each explanatory variable can be found in the  
 285 supplementary material (Fig. S3). We used  $V_{S,surf}$  instead of the more common  $V_{S30}$ , as our grid resolution is 76  
 286 m, preventing us from accurately determining the time-averaged shear wave velocity in the top 30 m of each site  
 287 in our model. The coefficients and the total standard deviation for each model are summarized in Table 4.

288 **Table 4.** Regression coefficients for the attenuation model (AM)

| Mag. | IM  | a     | b      | c      | d                                  |                                   | e                                  |                                   | Standard Deviation ( $\sigma$ ) |
|------|-----|-------|--------|--------|------------------------------------|-----------------------------------|------------------------------------|-----------------------------------|---------------------------------|
|      |     |       |        |        | $R_{rup} > 58$ km<br>and $z_2 > 0$ | $R_{rup} < 58$ km<br>or $z_2 = 0$ | $R_{rup} > 58$ km<br>and $z_2 > 0$ | $R_{rup} < 58$ km<br>or $z_2 = 0$ |                                 |
| 6    | PGV | -1.01 | 59.34  | -0.685 | 0                                  |                                   | 0.56                               |                                   | 0.6                             |
| 7    | PGV | -1.22 | 151.81 | -0.669 | 0.56                               | 0                                 | 2.08                               | 2.42                              | 0.629                           |

289 **4.3 AM Variability**

290 We then examined the simulated data and the contribution of each scenario to the AM variability. We calculated  
 291 the within-event ( $\delta W$ ) and between-event ( $\delta B$ ) residuals (see Al Atik et al., (2010)) for each magnitude and  
 292 distance:

293  $\delta W_{i,j} = \ln PGV_{i,j}^{sim} - \ln PGV_i^m$  (2)

294  $\delta B_i = \ln PGV_i^m - \ln PGV^{AM}$  (3)

295 where  $PGV_{i,j}^{sim}$  is the simulation value for event  $i$  and recording  $j$ ,  $PGV_i^m$  is the median for event  $i$ , and  $PGV^{AM}$  is  
 296 the AM median value. The total residual is the sum of the within and between event residuals.

297 The residuals are presented in Fig. 6: total (Fig. 6a and 6b), within-event (Fig. 6c and 6d), and between-  
 298 events (Fig. 6e and 6f). The total residuals (Fig. 6a and 6b) show a large underprediction of the PGV from the  
 299 JVF scenario (orange) on which we modeled a super-shear rupture, up to a ratio of 2.5 and 2 in the Zevulun Valley  
 300 (orange triangles), for M 6 and M 7, respectively. However, the AM also exhibits over predictions; The PGV from  
 301 the scenarios nucleated in the crystalline basement (SF, JF, and CFZ), with rupture speed=  $3195 \text{ m s}^{-1}$ ), are  
 302 overpredicted down to a ratio of more than -1 (in ln units).

303 Some within-event residuals exhibit distance dependency; for M 7, the JVF (super-shear model) and JGF-  
 304 U (directivity model) residuals increase with rupture distances greater than 20 km. The JVF residuals also  
 305 demonstrate the same distance dependency for M 6; however, the effect is less prominent when compared to M7.

306 The effect of the rupture directivity (JGF-U) is demonstrated in comparing the Zevulun Valley and the  
 307 Sedimentary wedge within-event residuals (Fig. 6c and 6d). While in a symmetric rupture (JGF-B), the seismic  
 308 energy dissipates equally into the north and south parts of the model, in an asymmetric rupture (JGF-U), more  
 309 energy propagates toward the south, resulting in stronger ground motions at the Sedimentary wedge (Fig. 5).  
 310 However, the ground motions are less intensive at the Zevulun Valley compared to the symmetric rupture. As a  
 311 result, the within-event residuals for Zevulun Valley are higher for the JGF-B scenario compared to the JGF-U  
 312 scenario, while for the Sedimentary wedge, the opposite is true. Most clearly, the JVF between-event residuals  
 313 are the highest for both M 6 and M 7 with a ratio of 1 (Fig. 6e, and 6f).

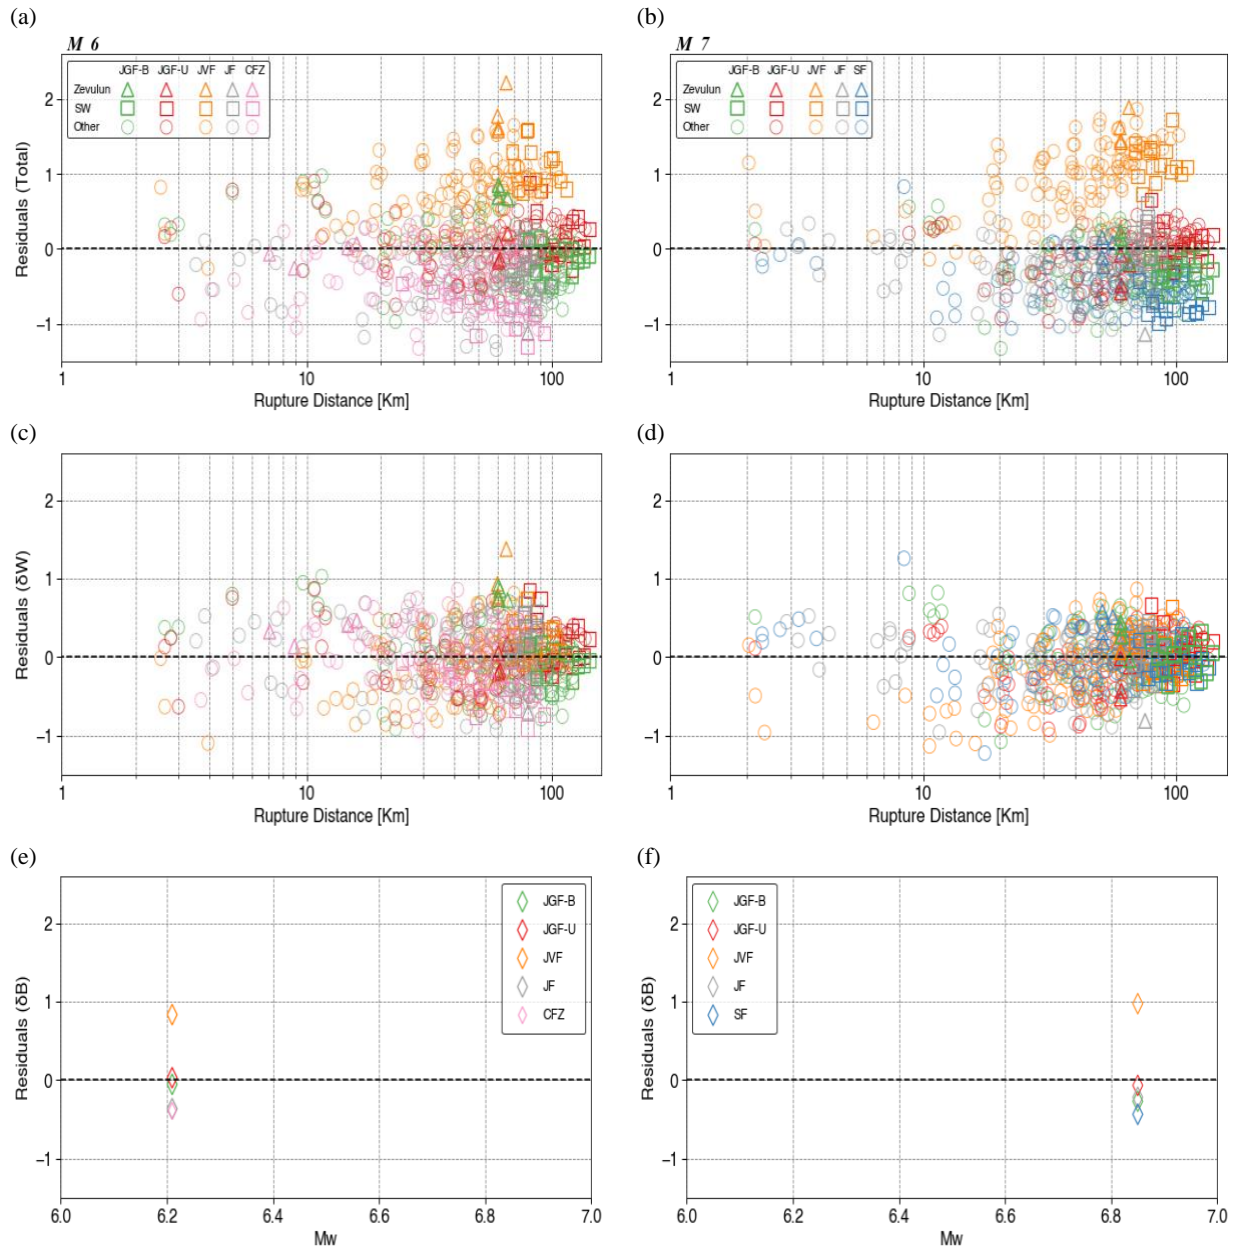

314 **Figure 5.** Residuals between simulated and attenuation model (AM) PGV as a function of rupture distance ( $R_{RUP}$ ), for bilateral  
 315 rupture on the Jordan Gorge Fault (JGF-B), Jericho Fault (JF) Carmel Fault Zone (CFZ; for M 6) and the Shemona Fault (SF;  
 316 for M 7), a southward unilateral rupture on the JGF (JGF-U), and a super-shear rupture on the Jordan Valley Fault (JVF); for  
 317 M 6 (left) and M 7 (right); (a) and (b) total residuals, (c) and (d) within-event ( $\delta W$ ) residuals, (e) and (f) between-event ( $\delta B$ )  
 318 residuals. The records from Zevulun Valley and the Sedimentary wedge (SW) are marked with triangles and rectangles,  
 319 respectively. The other records are marked with circles. Residuals are in  $\ln$  units.

320 We further study the single station variation of ground motions and quantify the misfit between the  
 321 simulated PGV and the AM PGV. We calculate the mean ground motion and its standard deviation at each station.  
 322 The residuals for single station  $k$  were calculated as follows:

323 
$$\delta_k = \ln PGV_k^{sim} - \ln PGV_k^{AM} \quad (4)$$

324 where  $PGV_k^{sim}$  and  $PGV_k^{AM}$  are the simulated and predicted mean PGV at station k, respectively. Figure 7 and  
325 Figure 8 show the mean simulated and mean AM PGVs for M 6 and M 7, respectively. For each station, we also  
326 plot the standard deviation using a scaled diameter circle.

327 Both figures show that simulated ground motions variability at a single station is large, not fully covered  
328 by the AM. For example, simulated ground motions at station 129 located on the Hula Valley exhibit a significant  
329 standard deviation. For M 6, it is the largest value (green triangle) of  $0.17 \text{ m s}^{-1}$  compared to  $0.09 \text{ m s}^{-1}$  (indigo)  
330 predicted by the AM, while for M 7, the largest standard deviation is  $0.59 \text{ m s}^{-1}$  (orange triangle) compared to  
331  $0.02 \text{ m s}^{-1}$  (light green triangle) observed at station 127 located on the Zevulun Valley. As a result, there is a large  
332 discrepancy between the simulated and AM values at specific stations.

333 In general, higher mean PGV values are accompanied by a larger standard deviation for both magnitudes;  
334 however, the ground motions variability is larger for M 7.

#### 335 4.4 Comparison with global models

336 To examine the agreement between our simulations with an instrumental, global GMM, we calculated the total  
337 residuals between PGVs from our simulations and PGVs predicted by the CB 14 model. The CB-14 PGVs were  
338 calculated for a strike-slip fault, where we used the surface shear wave velocity as the  $V_{s30}$  parameter and the basin  
339 response term  $Z_2$  as  $Z_{2.5}$ . Figure 9 shows the total residuals for the AM and CB14 models as a function of distance  
340 ( $R_{RUP}$ ). For both magnitudes, the AM (mean and standard deviation) oscillates near the zero-model bias (black  
341 horizontal dotted line). However, it deviates when approaching the region containing rupture distances typical of  
342 the Zevulun Valley. The effect is more noticeable for M 7. Figure 9 also shows that the CB14 is less consistent  
343 and performs differently for each magnitude. While for M 6, the GMM mostly over predicts (negative values) the  
344 simulated PGV (until reaching ZV and SW rupture distances zones), for M 7, it mostly under predicts them  
345 (positive values), except for large distances, up to a factor of 2 and above. In addition, the residuals calculated  
346 with respect to CB-14 exhibit a significant standard deviation of the mean ground motion, with considerably larger  
347 variability for M 7.

348 It is important to note that, by averaging the PGVs, we subdue the performance of both models at individual  
349 stations/Rupture distances; thus, we cannot analyze the residual's spatial variations at a specific location.  
350 However, it is sufficient to demonstrate that the global model deviates considerably from simulated ground  
351 motions.

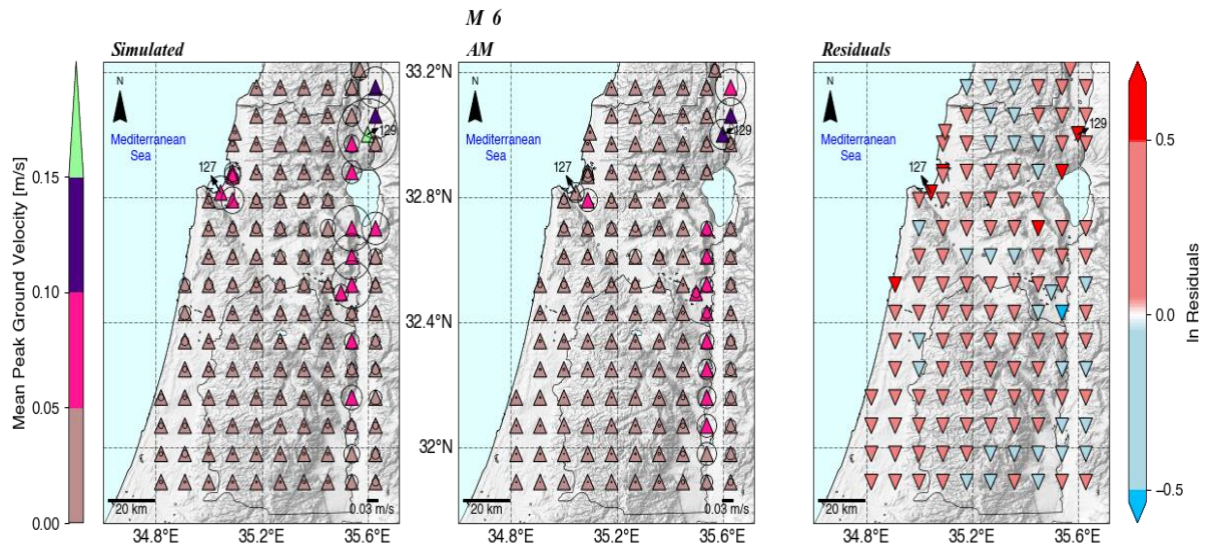

352 **Figure 6.** Map view of simulated and AM mean PGV (triangles) for M 6 and their standard deviation (diameters of the circles)  
 353 at each station, with the respective residuals in ln units (inverted triangles).

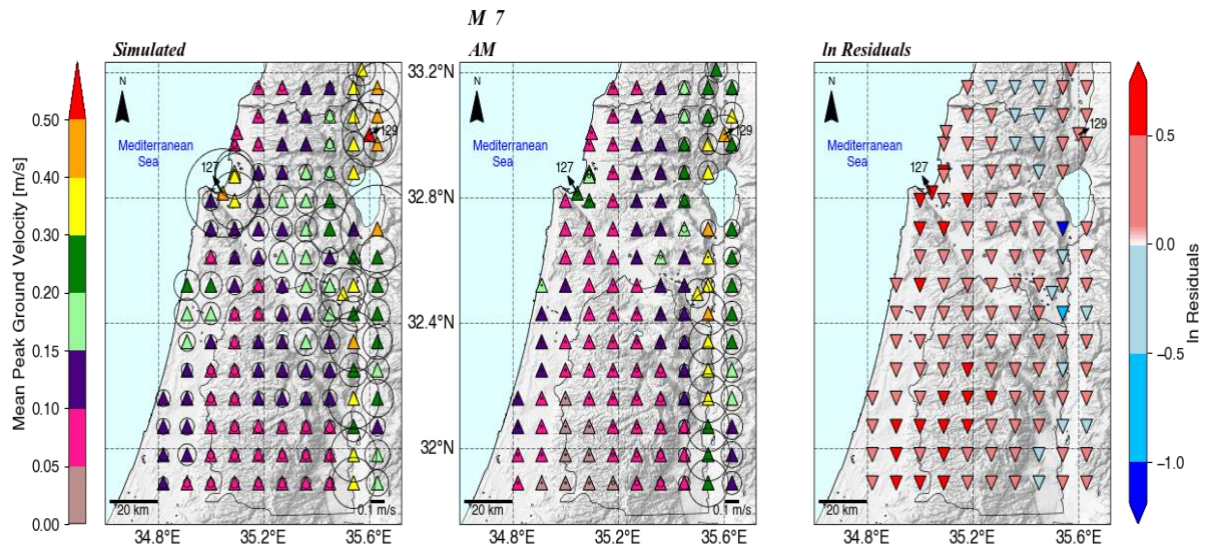

354 **Figure 7.** Map view of simulated and AM mean PGV (triangles) for M 7 and their standard deviation (diameters of the circles)  
 355 at each station, with the respective residuals in ln units (inverted triangles).

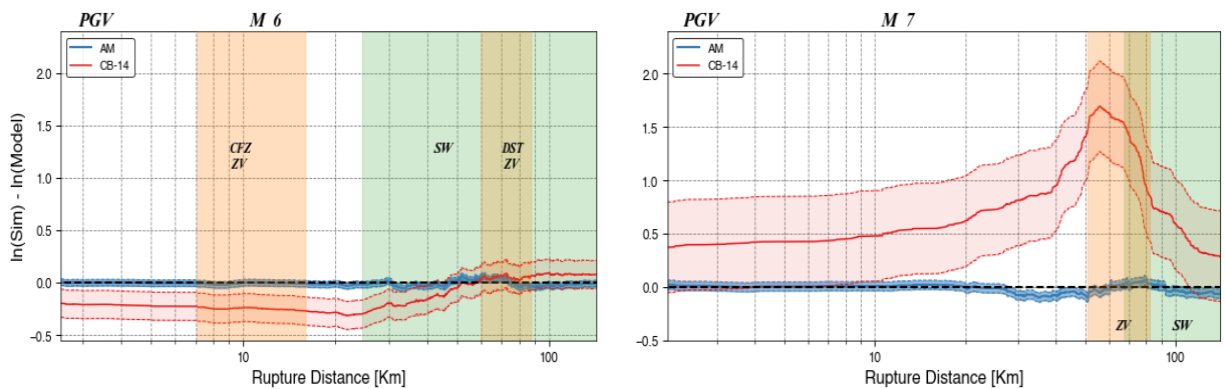

356 **Figure 8.** PGV Residuals between simulated (Sim) and predicted by the AM (blue) and CB-14 (red) models, as a function of  
 357 rupture distance ( $R_{rup}$ ), for M 6 (left) and M 7 (right). Thick lines represent the mean, and the shaded region denotes the

358 standard deviation at each distance. The green and yellow shaded regions indicate the range of rupture distances related to the  
 359 Sedimentary wedge (SW) and the Zevulun Valley (ZV), respectively. Residuals are in ln units.

360 **4.5 Significant duration**

361 Another important intensity measure is the significant duration (Ds595), the time interval between 5 % to 95 %  
 362 of the cumulative seismic energy (Arias Intensity) at a site. Figure 10 shows the simulated and empirical Ds 595  
 363 values as a function of rupture distance. The typical increase of the empirical model with distance is captured in  
 364 the reference (laterally homogenous) model. However, for all other models, the significant duration remains nearly  
 365 constant, at ruptures distances larger than 20 km. In addition, the empirical GMM mostly under-predicts the  
 366 simulated values between 2 to 50 Km for both magnitudes.

367 We postulate that this is caused by the complex geological setting of our model. The impact of geological  
 368 complexity is reflected in Ds 595 values from near-source stations, Zevulun Valley (triangles), and the  
 369 Sedimentary wedge (rectangles). At near-source stations, the significant duration is large due to the effects of deep  
 370 sedimentary structures along the DST, which also prolongs the path duration of the ground motions in other sites  
 371 (Shimony et al., 2021). On the contrary at the Zevulun Valley and the SW, the energy accumulates faster than in  
 372 other sites, as the ground motions are amplified, reaching 95 % of the total energy over a shorter duration.  
 373 Interestingly, the significant duration in Zevulun Valley is lower than in the Sedimentary wedge. As we expect  
 374 from deep sedimentary structures to prolong shaking duration, it may sound counterintuitive. However, it is  
 375 explained by the relative proximity of the Zevulun Valley to the rupture. Whereas in Zevulun Valley, most of the  
 376 energy arrives as a pulse at the beginning of the record, the energy at the more distant Sedimentary wedge  
 377 accumulates more gradually and reaches its maximum almost at the end of the record, resulting in longer Ds595  
 378 values. In general, there is no large deviation between the simulated significant duration for M 6 and M 7.  
 379 However, the empirical model shows a longer duration for M 7. This resembles in source duration is related to  
 380 the DSM settings, more specifically to the source fundamental frequency, which in our study, is the same for both  
 381 magnitudes; and it is a subject for testing in future works.

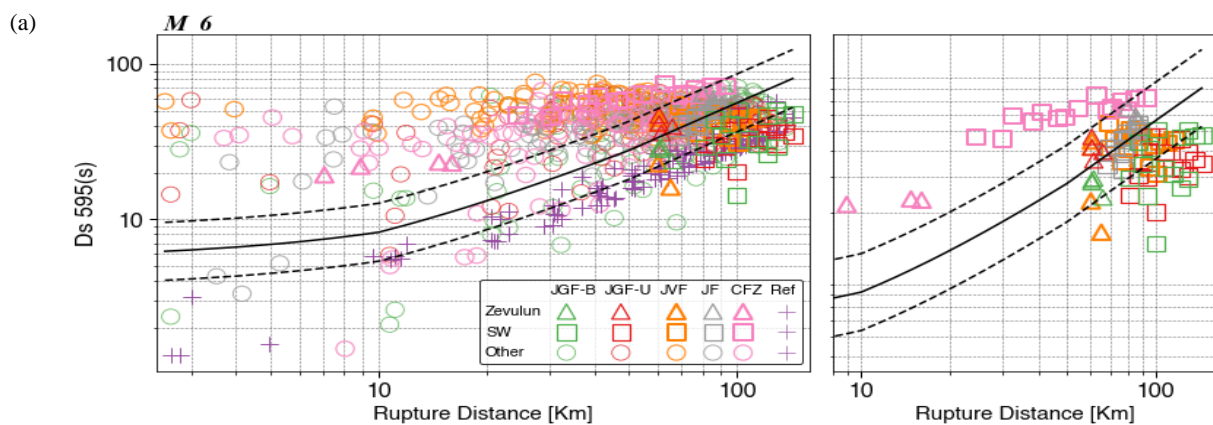

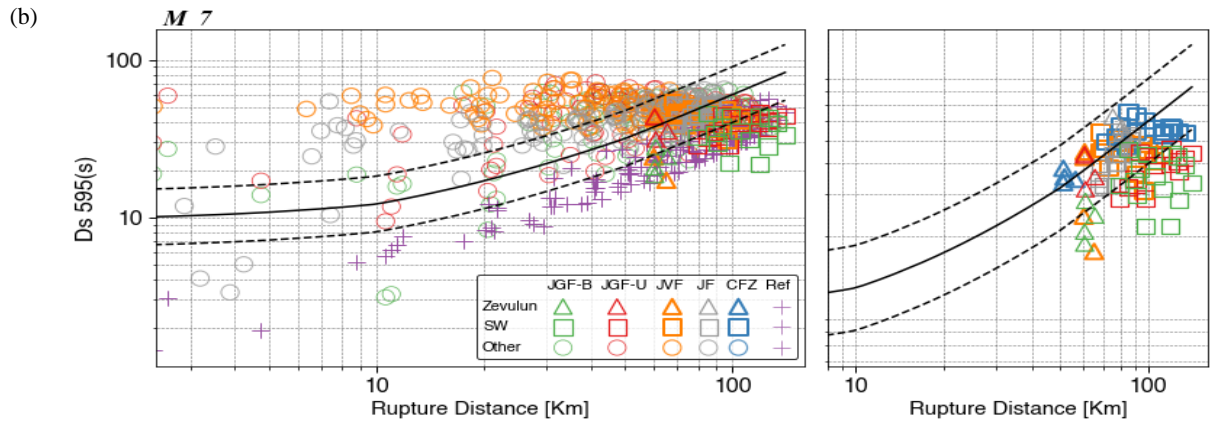

382 **Figure 9.** Comparison of 5 % to 95 % ground motions significant duration ( $D_s$  595) between simulated and empirical GMM  
 383 (Afshari and Stewart, 2016), for bilateral rupture on the Jordan Gorge Fault (JGF-B), Jericho Fault (JF) Carmel Fault Zone  
 384 (CFZ; for M 6) and the Shemona Fault (SF; for M 7), a southward unilateral rupture on the JGF (JGF-U), and a super-shear  
 385 rupture on the Jordan Valley Fault (JVF); for M 6 (a) and M 7 (b). Main plots (left) accompanied with subplots showing only  
 386 the records from the Zevulun Valley and the Sedimentary wedge (right). Solid and dashed lines represent the median and the  
 387 standard deviation of the empirical GMM, respectively. The records from Zevulun Valley and the Sedimentary wedge (SW)  
 388 are marked with triangles and rectangles, respectively. The other records are marked with circles.

## 389 5 Discussion and Summary

390 A strong earthquake in Israel is imminent. However, up to date, a comprehensive regional GMM describing the  
 391 spatial variability of ground motions has not yet been developed. This is mainly due to low seismicity rates and  
 392 magnitude bounded strong motion database, coupled with sparse instrumental coverage. The current ground  
 393 motion database lacks events with magnitude  $M > 6$ . To fill this gap and examine different source and path effects  
 394 on ground motions variability, we simulated M 6 and M 7 earthquakes with different source and path properties.  
 395 Subsequently, to study the ground motions variability, we developed a parametric attenuation model (AM) of  
 396 PGV for M 6 and M 7 earthquakes, based on  $R_{RUP}$ ,  $Z_2$ , and  $V_{S, surf}$  explanatory values.

397 Our analysis shows that the AM was unable to fully capture the variability of the simulated ground motions.  
 398 Except for the Jordan Valley Fault (JVF) scenarios, the AM overestimates most of the modeled ground motions.  
 399 We postulate that this overestimation results from the outlier, higher PGV values from the JVF scenario (Fig. 5),  
 400 shifting the average ground motion toward them. Also, the within-event residuals for the JVF scenario show a  
 401 distance dependency for  $R_{RUP} > 20$  Km, continuing to grow away from the fault. We describe this scenario as a  
 402 "black swan" of our simulations and account its outlier behavior to the effects of the super-shear rupture, specific  
 403 to this model, affecting both the source and path terms of the ground motions (Fig.6). Super-shear ruptures behave  
 404 differently from sub-shear ruptures in many aspects. Most pertinent to our analysis is the slow energy decay of  
 405 the super-shears relative to sub-shears (Bhat et al., 2007); thus, it cannot be fully captured by our AM, which is  
 406 based mainly on sub-shear ruptures. In addition, it was found that  $Z_2$ , depth to Mesozoic rock, has a very small  
 407 impact ( $<0.001$ ) on the standard deviation for the M 6, reducing it from 0.5998 to 0.5988 (Fig. S3). As a result,  
 408 the M 6 model depends only on rupture distance and  $V_{S, surf}$ . For M 7,  $Z_2$  is a good predictor for soil sites ( $Z_2 > 0$ )  
 409 located  $>58$  Km from the source, including the Zevulun Valley and the Sedimentary wedge (Fig. 6d), imposing a  
 410 great seismic hazard. We do not see a clear dependence of the deep sedimentary structures with  $Z_2$ , along the DST.  
 411 We speculate that Their site response may be masked by nearby source effects and requires additional analysis.



412 For each scenario, both magnitudes considered, we observed high PGV values at the Zevulun Valley and  
413 the Sedimentary wedge associated with local site effects. These sedimentary structures exhibit a larger  
414 discrepancy between the simulated and AM PGV values when compared with other sites. Such deviation indicates  
415 that the AM does not fully capture the site effects of these complex structures, and future model refinements are  
416 required. Likewise, the single station variability shows that the simulated values' highest mean and standard  
417 deviation were in Zevulun Valley and near-source stations. In addition, a relatively high standard deviation was  
418 also found in the Sedimentary wedge for M 7. This large single station variability is, apparently, the impact of the  
419 outlier JVF PGV values. The AM does not account for the standard deviation at near-source and Zevulun Valley  
420 stations for the M 6 and almost at all stations for the M 7. In fact, as the AM was unable to capture the simulated  
421 JVF PGV values, it is expected that the single station variability cannot be captured either. Furthermore, we show  
422 that the larger discrepancy for M 7 is due to the larger deviation of the JVFs ground motions from the mean (Fig.  
423 6d,e).

424 Noteworthy to mention is that while the effect of the super-shear rupture on the AM performance is  
425 systematic over the entire computational domain, the effect of the southward directivity is distance-dependent,  
426 path effect, increasing towards the south, related to a larger amount of energy discharged in this direction.  
427 Additional records of super-shear and directivity ruptures and accounting for these source effects by additional  
428 model terms will improve the performance of the AM and will assist in better understanding the implications of  
429 these phenomena on the seismic hazard in Israel.

430 The comparison of the simulated ground motions with a global GMM (CB-14) showed that this model is  
431 not well constrained for the simulated ground motions and does not capture their total variability. We note that  
432 the comparison was performed on a single IM, the PGV values, one of several intensity measures provided by the  
433 CB-14. Thus, our findings are pertinent to the variability of PGV solely. It should be noted that PGV is a good  
434 proxy for structural damage (e.g., to Kaestli & Fäh, (2006); Wald et al., (1999)), hence a crucial parameter for  
435 seismic hazard mitigation. This discrepancy between modeled PGV and CB-14 PGVs will inevitably result in a  
436 discrepancy in the evaluation of structural damage.

437 The significant duration (DS595) comparison showed again that the imported model performs differently  
438 than the simulated ground motion and cannot explain the local variability due to complex geological structure,  
439 affecting the source, path and site terms of the ground motions. However, we note that the Ds595 from our  
440 simulations were calculated based on low frequency content (<1Hz) and may be biased from Ds595 calculated  
441 based on the complete spectrum comprised of both low and high frequencies. The effects of the frequency content  
442 on significant duration may be a potential topic for research in future works.

443 We acknowledge that our AM is not independent of the evaluated models, thus describing both their  
444 explanatory and predictive power (Mak et al., 2017). However, our goal was not to develop an independent and  
445 comprehensive GMM but to study the ground motion variability through a parametric model.

446 Recently, Maiti et al., (2021) developed a suite of nine GMMs for Israel, in the magnitude range of 3 to 8  
447 and distance range of 1 to 300 Km. These models are formulated in Fourier amplitude spectra (FAS) and are based  
448 on one empirical and four simulated ground motion datasets and two empirical host models. The simulated ground  
449 motions were generated using the Stochastic Method SIMulation (SMSIM) model of Boore (2003), with a unique  
450 set of parameters for each simulation, calibrated with the empirical ground motions dataset (discussed in detail in  
451 Yagoda-Biran et al., (2021)). However, the GMMs do not fully account for a local source, path, and site effects

452 due to sparse empirical database at large magnitudes ( $M > 6$ ) and the utilization of a point-source stochastic  
453 simulation method. This method is useful for simulating mean ground motions. Yet, it is less appropriate for  
454 simulating site-specific and earthquake-specific ground motions and low-frequency ground motions, which are  
455 affected by the 3D geometry of the computational domain. The AM presented in this work is based on 3D  
456 simulations and incorporates a finite fault source with different rupture properties. This is the first step toward  
457 developing a regional GMM, accounting for local source, path, and site effects. In subsequent work, which is  
458 beyond the scope of the current research, we intend to develop a complete GMM for Israel, which will include all  
459 the magnitudes and will be based on empirical ( $M < 6$ ) as well as on synthetic ( $M > 6$ ) databases. In addition, we  
460 plan to incorporate new path and site terms such as  $Z_{0.8}$  for the Zevulun valley and the Sedimentary wedge,  
461 distance-dependent and rupture velocity-dependent attenuation for Directivity and super-shear ruptures, among  
462 others; as well as a source term for super-shear ruptures. Such a model is expected to perform better than imported  
463 global models by maintaining both; a lower aleatory variability and, as new synthetic data will be added to the  
464 database, reduced epistemic uncertainty of the median ground motions (Abrahamson et al., 2019).

465 The population of Israel is fast-growing, with an annual rate of 1.8 % (OECD 2020 data), compared with  
466 the 0.4 % average of the OECD. Coupled with fast economic growth of 4.5 % (OECD 2019 data), the demand for  
467 housing and infrastructure constantly elevates the seismic risk in Israel. Our work shows that the ground motions  
468 in Israel from M 6 and M 7 earthquakes are expected to be very damaging, up to 8-9 EMS (Fig. S4). Furthermore,  
469 the modeled ground motions exhibit considerable spatial variability, which imported GMMs do not fully capture.  
470 The development of a local comprehensive GMM model is therefore critical for the mitigation of seismic risk. In  
471 the foreseen future, the moderate-strong ground motion data gap will be filled by synthetic ground motion records  
472 from systematic numerical simulations.

## 473 **Data and resources**

474 Israel Seismic catalog (Fig. 1a), expanded after Wetzler & Kurzon (2016) catalog and the configuration of the  
475 Israel seismic network (Fig. 1b) after Kurzon et al., (2020) can be found at  
476 <https://earthquake.co.il/en/earthquake/searchEQS.php> and <https://earthquake.co.il/en/network/accNetwork.php>,  
477 respectively. The ground motions database of Israel (Fig. 2) discussed in Yagoda-Biran et al., (2021) is available  
478 at <https://earthquake.co.il/en/hazards/EngSeismology.php>. The Taub Center population projections for Israel are  
479 accessible at <https://www.taubcenter.org.il/en/pr/population-projections-for-israel-2017-2040/>. OECD population  
480 and economic growth rates can be found at <https://data.oecd.org/israel.htm#profile-economy>. Simulations were  
481 performed using SW4 version 2.0 (v2.0; Petersson and Sjögren, 2017a), an open-source package for wave  
482 propagation simulations, available at [github.com/geodynamics/sw4](https://github.com/geodynamics/sw4) (last accessed June 2021). Data processing  
483 was done with the pySW4 package from Shahr Shani-Kadmiel, available at  
484 <https://github.com/shaharkadmiel/pySW4> (last accessed July 2021), and "obspy" (Beyreuther et al., 2010),  
485 developed for numerical seismology. Figures were prepared with Matplotlib (Hunter, 2007) and Cartopy (Met  
486 Office, 2016). Peak ground velocity (PGV) values, according to Campbell and Bozorgnia (2014), were calculated  
487 using the Next Generation Attenuation-West Project (NGA-West2) ground-motion prediction equations (GMPEs)  
488 excel file, available at <https://apps.peer.berkeley.edu/ngawest2/databases/> (last accessed July 2021). The  
489 supplemental material includes: (1) synthetic station network deployed in our models (Fig. S1); (2) distributed  
490 slip model (DSM) slip distribution and rupture time (Fig. S2); (3) the evolution of the residuals between simulated

491 and attenuation model (AM) PGV for M 6 and M 7 (Fig. S3) and (4) map view of simulated mean EMS intensity  
492 calculated according to Kaestli & Fäh, (2006).

493 *Competing interests.* The authors declare that they have no conflict of interest.

#### 494 **Acknowledgments**

495 This research was partially funded by the Ministry of Energy, Israel (Grant Number 219-17-02). Co-author JG  
496 was partially supported by the Ministry of Energy scholarship for graduate studies (Tender 76/19).

#### 497 **References**

- 498 Abrahamson, N. A., Kuehn, N. M., Walling, M., and Landwehr, N.: Probabilistic seismic hazard analysis in  
499 California using nonergodic ground-motion models, *Bull. Seismol. Soc. Am.*, 109, 1235–1249,  
500 <https://doi.org/10.1785/0120190030>, 2019.
- 501 Afshari, K. and Stewart, J. P.: Physically parameterized prediction equations for significant duration in active  
502 crustal regions, *Earthq. Spectra*, 32, 2057–2081, <https://doi.org/10.1193/063015EQS106M>, 2016.
- 503 Agnon, A.: Pre-instrumental earthquakes along the Dead Sea rift, in: *Modern Approaches in Solid Earth*  
504 *Sciences*, vol. 6, Springer, 207–261, [https://doi.org/10.1007/978-94-017-8872-4\\_8](https://doi.org/10.1007/978-94-017-8872-4_8), 2014.
- 505 Aldersons, F., Ben-Avraham, Z., Hofstetter, A., Kissling, E., and Al-Yazjeen, T.: Lower-crustal strength under  
506 the Dead Sea basin from local earthquake data and rheological modeling, *Earth Planet. Sci. Lett.*, 214, 129–142,  
507 [https://doi.org/10.1016/S0012-821X\(03\)00381-9](https://doi.org/10.1016/S0012-821X(03)00381-9), 2003.
- 508 Ambraseys, N. N.: Comparison of frequency of occurrence of earthquakes with slip rates from long-term  
509 seismicity data: The cases of Gulf of Corinth, Sea of Marmara and Dead Sea Fault Zone, *Geophys. J. Int.*, 165,  
510 516–526, <https://doi.org/10.1111/j.1365-246X.2006.02858.x>, 2006.
- 511 Anderson, J. G. and Brune, J. N.: Probabilistic seismic hazard analysis without the ergodic assumption, *Seismol.*  
512 *Res. Lett.*, 70, 19–28, <https://doi.org/10.1785/gssrl.70.1.19>, 1999.
- 513 Al Atik, L., Abrahamson, N., Bommer, J. J., Scherbaum, F., Cotton, F., and Kuehn, N.: The variability of  
514 ground-motion prediction models and its components, *Seismol. Res. Lett.*, 81, 794–801,  
515 <https://doi.org/10.1785/gssrl.81.5.794>, 2010.
- 516 Bartov, Y., Steinitz, G., Eyal, M., and Eyal, Y.: Sinistral movement along the Gulf of Aqaba - Its age and  
517 relation to the opening of the Red Sea, *Nature*, 285, 220–222, <https://doi.org/10.1038/285220a0>, 1980.
- 518 Ben-Avraham, Z., Ginzburg, A., Makris, J., and Eppelbaum, L.: Crustal structure of the Levant Basin, eastern  
519 Mediterranean, 346, 23–43, [https://doi.org/10.1016/S0040-1951\(01\)00226-8](https://doi.org/10.1016/S0040-1951(01)00226-8), 2002.
- 520 Beyreuther, M., Barsch, R., Krischer, L., Megies, T., Behr, Y., and Wassermann, J.: ObsPy: A python toolbox  
521 for seismology, *Seismol. Res. Lett.*, 81, 530–533, <https://doi.org/10.1785/gssrl.81.3.530>, 2010.
- 522 Bhat, H. S., Dmowska, R., King, G. C. P., Klinger, Y., and Rice, J. R.: Off-fault damage patterns due to  
523 supershear ruptures with application to the 2001 Mw 8.1 Kokoxili (Kunlun) Tibet earthquake, *J. Geophys. Res.*  
524 *Solid Earth*, 112, 1–19, <https://doi.org/10.1029/2006JB004425>, 2007.
- 525 Boore, D. M.: Simulation of ground motion using the stochastic method, *Pure Appl. Geophys.*, 160, 635–676,  
526 <https://doi.org/10.1007/PL00012553>, 2003.
- 527 Brocher, T. M.: Key elements of regional seismic velocity models for long period ground motion simulations, *J.*

528 Seismol., 12, 217–221, <https://doi.org/10.1007/s10950-007-9061-3>, 2008.

529 Campbell, K. W. and Bozorgnia, Y.: NGA ground motion model for the geometric mean horizontal component  
530 of PGA, PGV, PGD and 5% damped linear elastic response spectra for periods ranging from 0.01 to 10 s,  
531 Earthq. Spectra, 24, 139–171, <https://doi.org/10.1193/1.2857546>, 2008.

532 Campbell, K. W. and Bozorgnia, Y.: NGA-West2 ground motion model for the average horizontal components  
533 of PGA, PGV, and 5% damped linear acceleration response spectra, Earthq. Spectra, 30, 1087–1114,  
534 <https://doi.org/10.1193/062913EQS175M>, 2014.

535 Chaljub, E., Moczo, P., Tsuno, S., Bard, P. Y., Kristek, J., Käser, M., Stupazzini, M., and Kristekova, M.:  
536 Quantitative comparison of four numerical predictions of 3D ground motion in the Grenoble Valley, France,  
537 Bull. Seismol. Soc. Am., 100, 1427–1455, <https://doi.org/10.1785/0120090052>, 2010.

538 Douglas, J. and Aochi, H.: A survey of techniques for predicting earthquake ground motions for engineering  
539 purposes, Surv. Geophys., 29, 187–220, <https://doi.org/10.1007/s10712-008-9046-y>, 2008.

540 Garfunkel, Z.: Lateral motion and deformation along the Dead Sea transform, in: Modern Approaches in Solid  
541 Earth Sciences, vol. 6, Springer International Publishing, 109–150, [https://doi.org/10.1007/978-94-017-8872-4\\_5](https://doi.org/10.1007/978-94-017-8872-4_5), 2014.

542  
543 Graves, R. and Pitarka, A.: Refinements to the Graves and Pitarka (2010) broadband ground-motion simulation  
544 method, Seismol. Res. Lett., 86, 75–80, <https://doi.org/10.1785/0220140101>, 2015.

545 Graves, R., Jordan, T. H., Callaghan, S., Deelman, E., Field, E., Juve, G., Kesselman, C., Maechling, P., Mehta,  
546 G., Milner, K., Okaya, D., Small, P., and Vahi, K.: CyberShake: A Physics-Based Seismic Hazard Model for  
547 Southern California, Pure Appl. Geophys., 168, 367–381, <https://doi.org/10.1007/s00024-010-0161-6>, 2011.

548 Grünthal, G., Hakimhashemi, A., Schelle, H., Bosse, C., and Wahlström, R.: The long-term temporal behaviour  
549 of the seismicity of the Dead Sea Fault Zone and its implication for time-dependent seismic hazard assessments,  
550 <https://doi.org/10.2312/GFZ.b103-09098>, 2009.

551 Gvirtzman, Z., Zilberman, E., and Folkman, Y.: Reactivation of the Levant passive margin during the late  
552 Tertiary and formation of the Jaffa Basin offshore central Israel, J. Geol. Soc. London., 165, 563–578,  
553 <https://doi.org/10.1144/0016-76492006-200>, 2008.

554 Gvirtzman Z., I. M. and Sagee, Y.: Re-processing and geological re-interpretation of old seismic lines of Haifa  
555 bay, Geol. Surv. Isr. GSI/27/2011, 2011.

556 Gvitzman, Z. and Zaslavsky, Y.: Map of Zones with Potentially High Ground Motion Amplification:  
557 Explanatory Notes, Rep. Num. GSI/15/2009, 2009.

558 Hamiel, Y., Piatibratova, O., and Mizrahi, Y.: Creep along the northern Jordan Valley section of the Dead Sea  
559 Fault, Geophys. Res. Lett., 43, 2494–2501, <https://doi.org/10.1002/2016GL067913>, 2016.

560 Hunter, J. D.: Matplotlib: A 2D graphics environment, Comput. Sci. Eng., 9, 90–95,  
561 <https://doi.org/10.1109/MCSE.2007.55>, 2007.

562 Israel Standards Institution: Standard SI 413. Design Provisions for Earthquake Resistance of Structures.  
563 Amendment No. 5, 2013.

564 Kaestli, P. and Fäh, D.: Rapid estimation of macroseismic effects and Shakemaps using macroseismic data, in:  
565 1st European Conf. Earthquake Engineering and Seismology, 1535, 2006.

566 Kuehn, N. M., Abrahamson, N. A., and Walling, M. A.: Incorporating nonergodic path effects into the NGA-  
567 west2 ground-motion prediction equations, Bull. Seismol. Soc. Am., 109, 575–585,

568 <https://doi.org/10.1785/0120180260>, 2019.

569 Kurzon, I., Nof, R. N., Laporte, M., Lutzky, H., Polozov, A., Zakosky, D., Shulman, H., Goldenberg, A.,  
570 Tatham, B., and Hamiel, Y.: The “TRUAA” seismic network: Upgrading the Israel Seismic Network-toward  
571 national earthquake early warning system, *Seismol. Res. Lett.*, 91, 3236–3255,  
572 <https://doi.org/10.1785/0220200169>, 2020.

573 Lan, X., Xing, H., Zhou, J., and Zhao, J. X.: A comparison of the source, path, and site effects of the strong-  
574 motion records from the western and the southwestern parts of China with modern ground-motion prediction  
575 equations, *Bull. Seismol. Soc. Am.*, 109, 2691–2709, <https://doi.org/10.1785/0120180293>, 2019.

576 Maiti, S. K., Yagoda-Biran, G., and Kamai, R.: A Suite of Alternative Ground-Motion Models (GMMs) for  
577 Israel, *Bull. Seismol. Soc. Am.*, 111, 2177–2194, <https://doi.org/10.1785/0120210003>, 2021.

578 Mak, S., Cotton, F., and Schorlemmer, D.: Measuring the performance of ground-motion models: The  
579 importance of being independent, <https://doi.org/10.1785/0220170097>, 2017.

580 Met Office: Cartopy: a cartographic python library with a matplotlib interface, <http://scitools.org.uk/cartopy>,  
581 2016.

582 Mizutori, M. and D’ebarati, G.: The human cost of disasters: an overview of the last 20 years (2000-2019), UN  
583 Off. Disaster Risk Reduction., <https://doi.org/10.18356/79b92774-en>, 2020.

584 Pesaresi, M., Ehrlich, D., Kemper, T., Siragusa, A., Florczyk, A., Freire, S., and Corbane, C.: Atlas of the  
585 Human Planet 2017. Global Exposure to Natural Hazards. EUR 28556 EN, 92 pp., 2017.

586 Petersson, N. A. and Sjogreen, B.: SW4 Users Guide, Lawrence Livermore Natl. Lab. Tech. Rep. LLNL-SM,  
587 662014, 2014.

588 Petersson, N. A. and Sjogreen, B.: SW4, version 2.0, Computational Infrastructure of Geodynamics,  
589 <https://doi.org/10.5281/zenodo.1045297>, 2017a.

590 Petersson, N. A. and Sjogreen, B.: User’s guide to SW4, version 2.0, LLNL-SM-741439., [https://doi.org/.](https://doi.org/),  
591 2017b.

592 Pitarka, A., Akinci, A., De Gori, P., and Buttinelli, M.: Deterministic 3D Ground-Motion Simulations (0–5 Hz)  
593 and Surface Topography Effects of the 30 October 2016 Mw 6.5 Norcia, Italy, Earthquake, *Bull. Seismol. Soc.*  
594 *Am.*, <https://doi.org/10.1785/0120210133>, 2021.

595 Rosenthal, M., Ben-Avraham, Z., and Schattner, U.: Almost a sharp cut – A case study of the cross point  
596 between a continental transform and a rift, based on 3D gravity modeling, 761, 46–64,  
597 <https://doi.org/10.1016/j.tecto.2019.04.012>, 2019.

598 Rybakov, M., Fleischer, L., and ten Brink, U.: The Hula Valley subsurface structure inferred from gravity data,  
599 *Isr. J. Earth Sci.*, 52, 113–122, <https://doi.org/10.1560/WF6V-4BVG-GXQM-PKVR>, 2003.

600 Sadeh, M., Hamiel, Y., Ziv, A., Bock, Y., Fang, P., and Wdowinski, S.: Crustal deformation along the Dead Sea  
601 Transform and the Carmel Fault inferred from 12 years of GPS measurements, *J. Geophys. Res. Solid Earth*,  
602 117, <https://doi.org/10.1029/2012JB009241>, 2012.

603 Shamir, G., Bartov, Y., Sneh, A., Fleisher, L., Arad, V., and Rosensaft, M.: Preliminary seismic zonation in  
604 Israel, *earthquake.co.il*28 , pp., 2001.

605 Shani-Kadmie, S., Tsesarsky, M., and Gvirtzman, Z.: Distributed slip model for forward modeling strong  
606 Earthquakes, *Bull. Seismol. Soc. Am.*, 106, 93–103, <https://doi.org/10.1785/0120150102>, 2016.

607 Shani-Kadmiel, S., Volk, O., Gvirtzman, Z., and Tsesarsky, M.: Ground motion amplification atop the complex

608 sedimentary basin of Haifa Bay (Israel), *Bull. Earthq. Eng.*, 18, 821–836, [https://doi.org/10.1007/s10518-018-](https://doi.org/10.1007/s10518-018-00533-9)  
609 00533-9, 2020.

610 Shi, Z. and Ben-Zion, Y.: Dynamic rupture on a bimaterial interface governed by slip-weakening friction,  
611 *Geophys. J. Int.*, 165, 469–484, <https://doi.org/10.1111/j.1365-246X.2006.02853.x>, 2006.

612 Shimony, R., Gvirtzman, Z., and Tsesarsky, M.: Seismic energy release from intra-basin sources along the dead  
613 sea transform and its influence on regional ground motions, *Bull. Seismol. Soc. Am.*, 111, 295–308,  
614 <https://doi.org/10.1785/0120200215>, 2021.

615 Wald, D. J., Quitoriano, V., Heaton, T. H., and Kanamori, H.: Relationships between peak ground acceleration,  
616 peak ground velocity, and modified mercalli intensity in California, *Earthq. Spectra*, 15, 557–564,  
617 <https://doi.org/10.1193/1.1586058>, 1999.

618 Walling, M. . and Abrahamson, N. .: Non-Ergodic Probabilistic Seismic Hazard Analyses, in: 15th World  
619 Conference on Earthquake Engineering (15WCEE). Lisbon, Portugal, 24-28 September, 2012.

620 Wang, Z.: A Clear Definition of Seismic Hazard and Risk: A Basis for Hazard and Risk Assessment,  
621 Communication, and Management, *Am. Geophys. Union*, 2005, S53B-1110, 2005.

622 Wells, D. L. and Coppersmith, K. J.: New empirical relationships among magnitude, rupture length, rupture  
623 width, rupture area, and surface displacement, *Bull. - Seismol. Soc. Am.*, 84, 974–1002, 1994.

624 Wetzler, N. and Kurzon, I.: The earthquake activity of Israel: Revisiting 30 years of local and regional seismic  
625 records along the dead sea transform, *Seismol. Res. Lett.*, 87, 47–58, <https://doi.org/10.1785/0220150157>, 2016.

626 Yagoda-Biran, G., Maiti, S. K., Wetzler, N., Nof, R. N., Pashcur, Y., and Kamai, R.: A ground-motion database  
627 for Israel with its corresponding point-source parameters, for engineering seismology applications, *Seismol.*  
628 *Res. Lett.*, 92, 2679–2690, <https://doi.org/10.1785/0220200477>, 2021.

629 Zohar, M.: Temporal and spatial patterns of seismic activity associated with the Dead Sea transform (DST)  
630 during the past 3000 yr, *Seismol. Res. Lett.*, 91, 207–221, <https://doi.org/10.1785/0220190124>, 2019.

631

## Supplementary Material

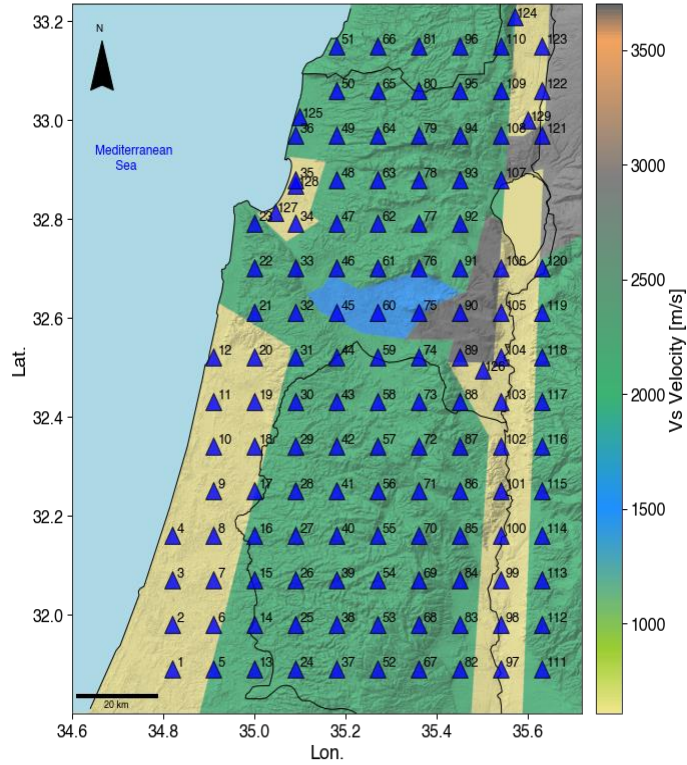

**Figure 1.** Numerated Synthetic stations grid (blue triangles), deployed in our model.

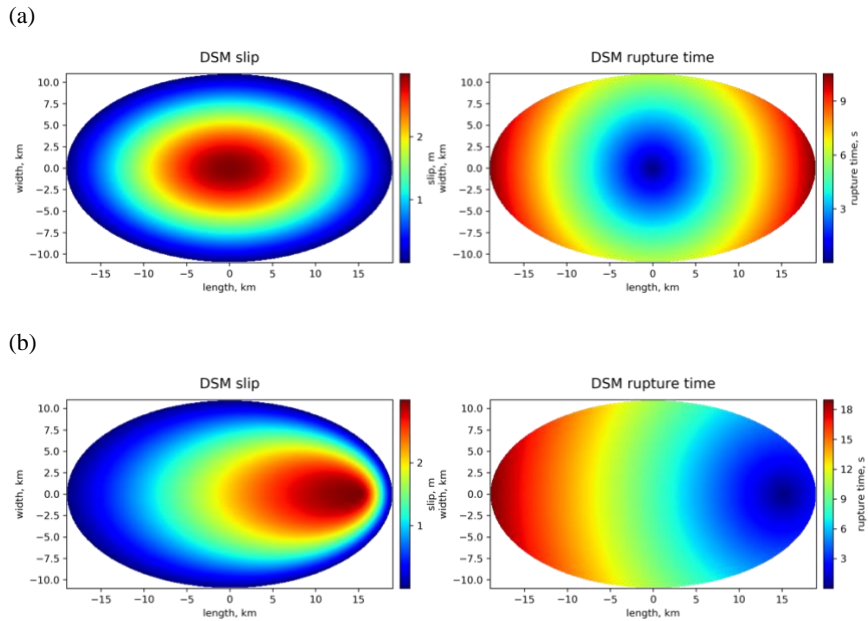

**Figure 2.** Examples of Rupture patches of the DSM, as used in simulating (a) symmetric and (b) southward unilateral M 7 rupture models.

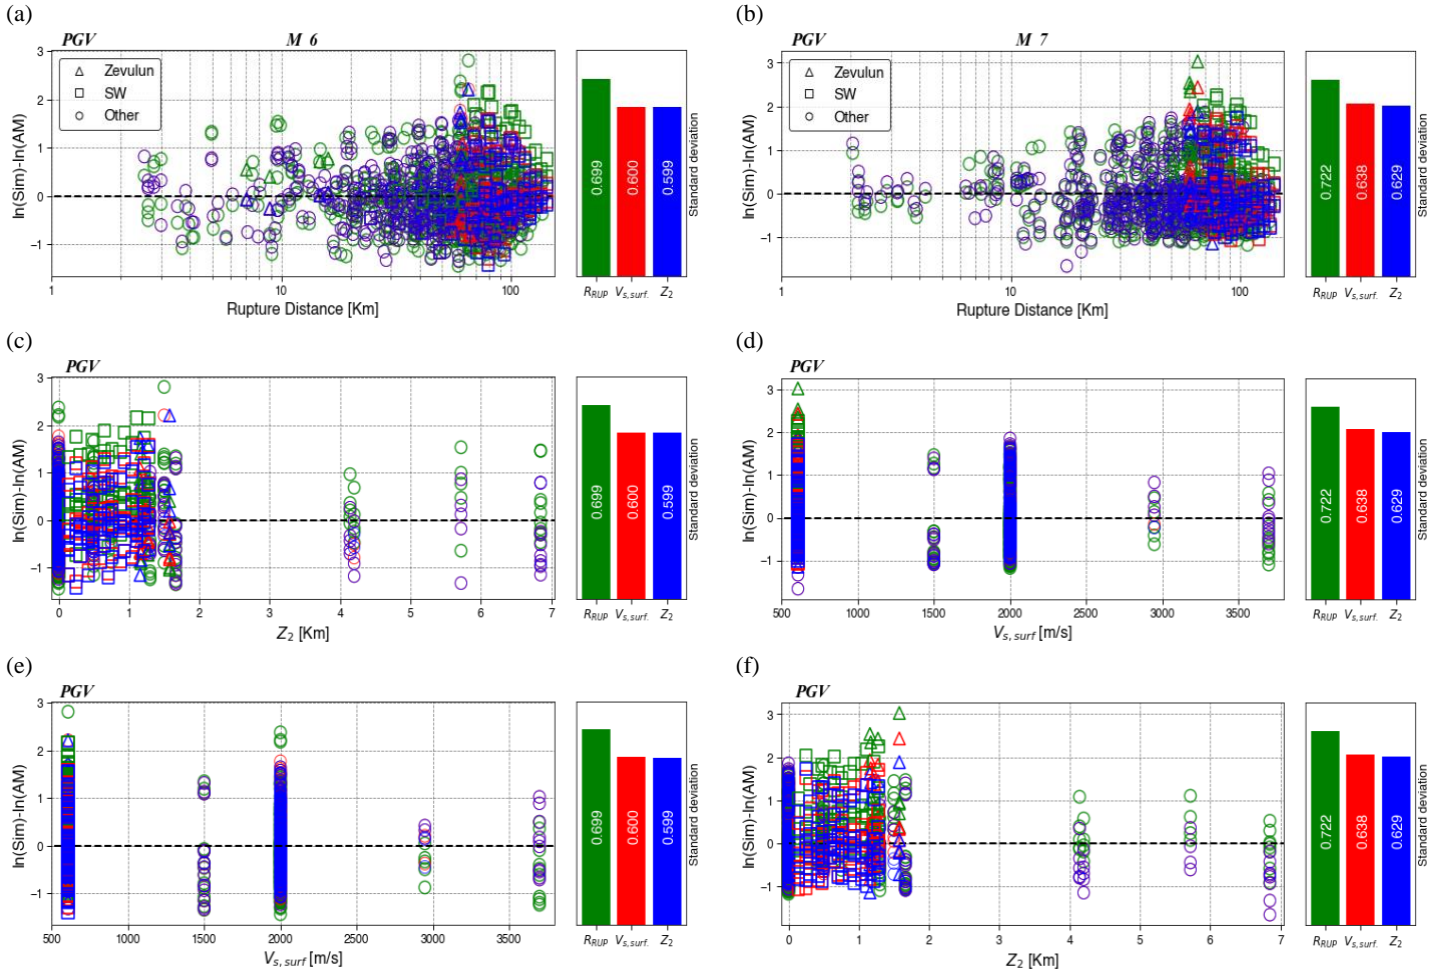

**Figure 3.** Residuals between simulated and attenuation model (AM) PGV for M 6 (left) and M 7 (right), as a function of each of the explanatory variables; (a) and (b) rupture distance ( $R_{\text{RUP}}$ ), (c) and (d) surface shear wave velocity ( $V_{s, \text{surf}}$ ), (e) and (f) depth to  $V_s = 2$  km/s beneath the site ( $Z_2$ ). The green, red and blue colors correspond to the residual's standard deviation, evolving with each added explanatory variable (green-  $R_{\text{RUP}}$ , red-  $R_{\text{RUP}}$  and  $V_{s, \text{surf}}$ , blue-  $R_{\text{RUP}}$ ,  $V_{s, \text{surf}}$  and  $Z_2$ ). The records from Zevulun valley and the Sedimentary wedge marked with triangles and rectangles respectively. The other records marked with circles.



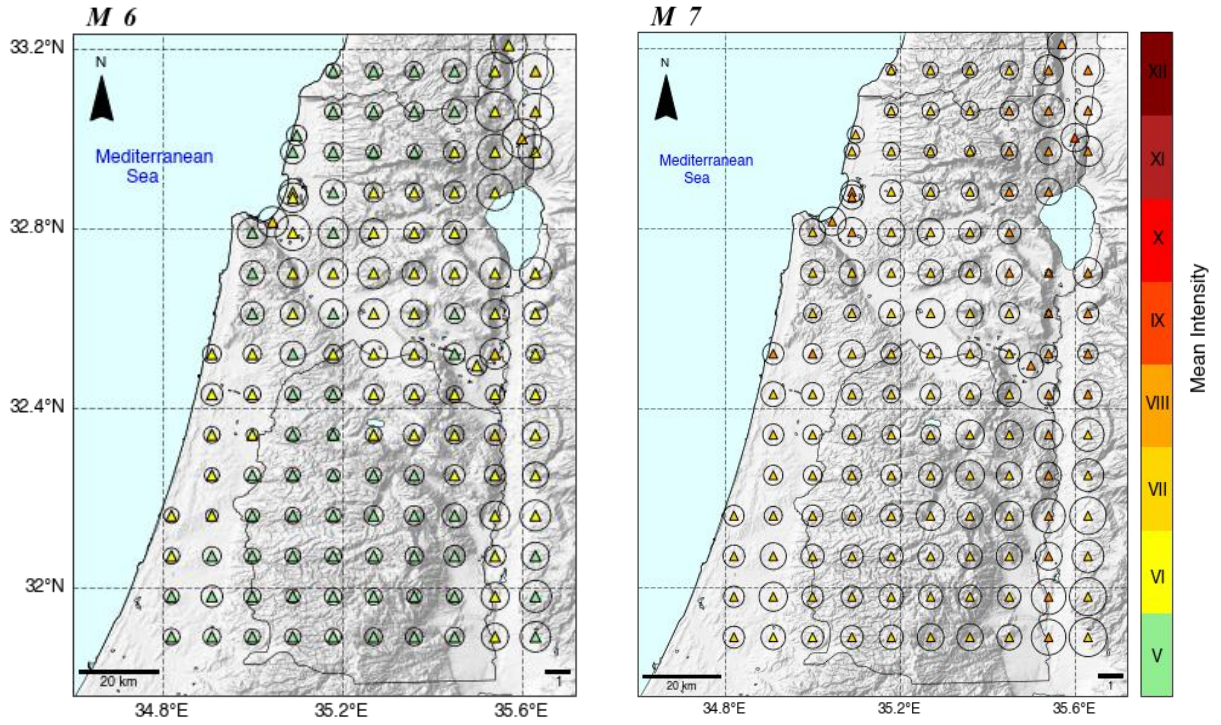

**Figure 4.** Map view of simulated mean EMS intensity calculated according to Kaestli & Fäh, (2006) and rounded off to the nearest integer (triangles) for M 6 (left) and M 7 (right) and their standard deviation (diameter of the circles) at each station.
